1           **A single-cell atlas depicting the cellular and molecular**  
2           **features in human ligamental degeneration: a single cell**  
3           **combined spatial transcriptomics study**

4    Authors: Runze Yang<sup>1</sup>, Tianhao Xu<sup>1</sup>, Lei Zhang<sup>1</sup>, Minghao Ge<sup>1</sup>, Liwei Yan<sup>1</sup>, Jian Li<sup>1</sup>,  
5    Weili Fu<sup>1\*</sup>

6    Affiliations:

7    1. Department of Orthopedics, Orthopedic Research Institute, West China Hospital,  
8    Sichuan University, Chengdu 610041, China

9    \* Corresponding information:

10   Weili Fu

11   Email: foxwin2008@163.com

12

13   **Abstract**

14   **Background** To systematically identify cell types in human ligament, investigate how  
15   ligamental cell identities, functions, and interactions participated the process of  
16   ligamental degeneration and explore the changes of ligamental microenvironment  
17   homeostasis in the disease progression.

18   **Methods** Using single-cell RNA sequencing and spatial RNA sequencing of  
19   approximately 49356 cells, we created a comprehensive cell atlas of healthy and  
20   degenerated human anterior cruciate ligaments. We explored the variations of the cell  
21   subtypes' spatial distributions and the different processes involved in the disease

22 progression, linked them with ligamental degeneration process using computational  
23 analysis.

24 **Results** We identified new fibroblast subgroups contributed to the disease and  
25 mapped out their spatial distribution in the tissue and revealed two stages of the  
26 degenerative process. We compared the cellular interactions between different tissue  
27 states and identified important signaling pathways may contribute to the disease.

28 **Conclusion** This cell atlas provides the molecular foundation for investigating how  
29 ligamental cell identities, biochemical functions, and interactions contributed to the  
30 ligamental degeneration process. The discoveries revealed the pathogenesis of  
31 ligamental degeneration at single-cell and spatial level which is characterized by  
32 extracellular matrix remodeling. Our results provide new insights into the control of  
33 ligamental degeneration and potential clues to developing novel diagnostic and  
34 therapeutic strategies.

35 **Funding** This study was funded by the National Natural Science Foundation of China  
36 (81972123, 82172508), Sichuan Science and Technology Program (2020YFH0075),  
37 Fundamental Research Funds for the Central Universities (2015SCU04A40),  
38 Chengdu Science and Technology Bureau Project (2019-YF05-00090-SN), and 1.3.5  
39 Project for Disciplines of Excellence of West China Hospital Sichuan University  
40 (ZYJC21030, ZY2017301).

41

42 **Keywords:** single-cell RNA-seq, spatial RNA-seq, ligamental degeneration,  
43 extracellular matrix remodeling

44

## 45 **Introduction**

46       With the increasing aging of the world's population, most of us crave a healthy  
47 and long life(Beard & Bloom, 2015). Good musculoskeletal healthy is essential to  
48 people to live independently in the society throughout their life course(Briggs et al.,  
49 2016). Skeletal ligaments, an important part of the musculoskeletal, are defined as  
50 dense connective tissue that span the joint and then fixed at both ends of the bone.  
51 One of the main functions of ligaments is mechanical as they passively maintain joint  
52 stability and assist in guiding of those joints through their normal range of motion  
53 when a tensile loading is applied(Frank, 2004). The knee is the largest and most  
54 complicated hinge joint associated with weight bearing in the human body. The  
55 anterior cruciate ligament (ACL) is crucial for knee kinematics, especially in rotation,  
56 and functions as an anterior/posterior stabilizer(Fleming, 2003). ACL degeneration  
57 can gradually result in chronic knee pain, instability and even poor life  
58 quality(Thompson et al., 2015). ACL rupture is a risk factor for cartilage degeneration  
59 and the development of osteoarthritis (OA)(Roos, Adalberth, Dahlberg, & Lohmander,  
60 1995). It has been reported that aging-related degenerative changes in the ACL might  
61 also contribute to OA occurrence and progression(Loeser, 2010), but mechanisms of  
62 ACL aging and degradation are remain unclear.

63       The extracellular matrix (ECM) is the physical basis for the biological functions  
64 of ligaments, and ACL degeneration is accompanied by alterations in the ECM. The  
65 ECM of ACL consist of collagen types I, II, III, and V, elastin, and

66 proteoglycans(Laurencin & Freeman, 2005), and collagen type I is a major  
67 determinant of tensile strength(Corps et al., 2006). ACL degeneration is characterized  
68 by disorganization of collagen fibers, cystic changes, mucoid degeneration and  
69 chondroid metaplasia(Hasegawa et al., 2012). Different types of pathological changes  
70 correspond to different ECM alterations. For example, mucoid degeneration reflects  
71 degradation of collagen and deposition of new glycosaminoglycans and cystic  
72 changes represent devoid of ECM in the diseased area(Hasegawa et al., 2012). It has  
73 been reported that some regions in the degenerated ACL have decreased type I  
74 collagen, whereas type II, III, and X collagen and aggrecan are significantly increased,  
75 and this abnormal ECM production can lead to biomechanical fault(Hasegawa et al.,  
76 2013; Hayashi et al., 2003). In recent years, many scholars have paid attention to the  
77 degeneration mechanism of ligaments. TGF $\beta$ 1, a member of the TGF superfamily, can  
78 be used to induce chondrogenic differentiation of ligament-derived stem cells in  
79 vitro(Schwarz et al., 2019) and is considered to be an essential molecule contributing  
80 to chondroid metaplasia. Some reports suggested that complement cascade could lead  
81 to ECM catabolism and contribute to ligament degeneration(Busch et al., 2013;  
82 Schulze-Tanzil, 2019).

83       There are various types of cells in the ligament(Kharaz, Canty-Laird, Tew, &  
84 Comerford, 2018) and building a detailed ligamental cell landscape is essential to  
85 understand ligamental characteristics and underlying pathogenesis of ACL  
86 degeneration and OA. As a result of the continuous technological innovation,  
87 single-cell RNA sequencing (scRNA-seq) is recognized as a significant tool for

88 depicting cellular heterogeneity(Wen & Tang, 2018; Zeng et al., 2019). Spatial RNA  
89 sequencing (spRNA-seq) is a recently developed revolutionary technology. It  
90 combined the advantages of the comprehensive analysis of bulk RNA sequencing and  
91 in situ hybridization to provide complete transcriptome data with spatial  
92 information(Li & Wang, 2021). Here, we performed scRNA-seq and spRNA-seq to  
93 obtain an unbiased atlas of ACL cell clusters. Our findings provide a better  
94 understanding of the inherent heterogeneity, construct the classifications of fibroblasts  
95 and profile the spatial information of identified cell clusters in the ACL. Notably, we  
96 also identified the cell interactions during the disease process and demonstrate the role  
97 of FGF and TGF- $\beta$  signaling pathways in ligament degeneration. Thus, our study  
98 reveals the cellular landscape of the human ACL and provides insight that could help  
99 to identify therapeutic targets for human ligament degeneration.

100

## 101 **Methods**

### 102 Human ligament cell sample preparation

103 The ligament specimens were collected from four joint replacement patients with  
104 osteoarthritis (degenerated ACLs) and four amputation patients with osteosarcoma  
105 (healthy ACLs).

106 All specimens removed were placed immediately in Dulbecco modified Eagle  
107 medium (DMEM) free of antibiotics and FBS under 4°C. Ligament samples were  
108 rinsed in precooled PBS and then were cut into 1 mm<sup>3</sup> pieces. Containing Collagenase  
109 type I (2 mg/ml) and 0.25% (w/v) trypsin DMEM was used to digest the specimens

110 for 1 h at 37°C using a Thermomixer at 1200 rpm (Eppendorf, Hamburg, Germany).

111 After that, Ham's F-12 media containing 10% FBS was added to stop the process of

112 digestion and then the digested tissue passed through a 100 µm cell strainer. Finally,

113 after centrifugation, cells were collected for subsequent batch analysis.

114

115 Single-cell RNA-seq analysis

116 The raw single cell sequencing data was mapped and quantified with the 10 ×

117 Genomics Inc. software package Cell Ranger (v5.0.1) and the GRCh38 reference

118 genome. Using the table of unique molecular identifiers produced by Cell Ranger, we

119 identified droplets that contained cells using the call of functional droplets generated

120 by cell ranger. After cell containing droplets were identified, gene expression matrices

121 were first filtered to remove cells with > 5% mitochondrial genes, < 250 or > 8000

122 genes, and < 500 UMI. Downstream analysis of Cellranger matrices was carried out

123 using R (4.1.3) and the Seurat package (v 4.1.0, [satijalab.org/seurat](https://satijalab.org/seurat)). In total, 49356

124 cells with an average of 2435 genes per cell were selected for ongoing analysis. Of

125 these single cells, 24721 were obtained from lesions ligament, included L2, L5, L6 and

126 L8. The remainder were cells from healthy and included L1, L3, L4 and L10.

127

128 Single-cell trajectory analysis

129 We used the Monocle3 v. 2.8.0 R package to infer a hierarchical organization part of

130 fibroblasts, to organize these cells in pseudotime. We took these subpopulations from

131 the Seurat data set from which we reperformed shared nearest neighbor clustering and

132 differential expression analysis as described previously. We then selected the  
133 differentially expressed genes based on fold-change expression for Monocle to order  
134 the cells using the DDRTree method and reverse graph embedding. We find gene  
135 co-expression modules according to the trend of gene expression, and show the  
136 relationship between cells and modules in the form of heat maps.

137

138 Ligand-receptor interaction model.

139 We used the ligand-receptor interaction database from cellchat database to determine  
140 potential ligand-receptor interactions between fibroblast subpopulations and other cell  
141 types. The expression data were preprocessed for subsequent cell-cell communication  
142 analysis. The ligand or receptor that is overexpressed in a class of cells is first  
143 identified, and the gene expression data is then projected into a protein-protein  
144 interaction network. Whenever a ligand or receptor is overexpressed, the  
145 ligand-receptor interaction is recognized. CellphoneDB is based on the expression of  
146 a receptor in one cell type with a ligand in another cell type, resulting in rich  
147 receptor-ligand interactions between two cell populations. For the gene expressed by  
148 the cell population, the percentage of cells expressing the gene and the average gene  
149 expression were calculated. The gene was removed if it was expressed only in 10% or  
150 less of the cells in the population (the default value is 0.1).

151

152 Spatial-transcriptome analysis

153 We used L1, L8 samples for spatial transcriptome analysis. We performed the Seurat

154 standard analysis. Machine prediction and marker gene methods were used to  
155 determine the cell type and used SCTransform for standard analysis of the data. First,  
156 we determine it is specific enough to finding a topic profile (similar to a feature vector)  
157 for each cell type, and then deconvolved the information by cell type and  
158 superimposed it onto the slice in pie chart form.

159

160 Deconvolution analysis

161 SCDC (v 0.0.0.9000) tool combined with single cell data was used to deconvolve bulk  
162 RNAseq data for cell type and content proportion analysis bulk RNAseq data. The  
163 bulk RNAseq data is also our own data. Histogram and heat map can be drawn for the  
164 predicted data, and the proportion of cell type content can be compared between  
165 groups. Then we used GSVA (v 1.42.0) to calculate the same data and draw heat maps  
166 to aid the analysis.

167

168 Statistical analysis

169 Nonparametric Wilcoxon rank sum test was used to analyze the differences between  
170 two groups. All statistical analyses were performed in R or GraphPad Prism (version  
171 5.0). Statistical significance was defined as \* $p < 0.05$ , \*\* $p < 0.01$ , \*\*\* $p < 0.001$ .

172

## 173 **Results**

174 1. Comprehensive scRNA-seq analyses resolve the major cell types in the human  
175 normal and degenerated ligament



176 To decipher cellular heterogeneity and construct the cell landscape for ligament  
177 degeneration, we performed single-cell transcriptomic profiling of cells from four  
178 healthy and four degenerated ACL. The characteristic pathological findings in the  
179 ACL of OA were identified by arthroscopy (figure1 A and B). In the normal group,  
180 the ligaments are white stripes with clear structure, and blood vessels can be seen on  
181 their surfaces. In the degenerated group, the ligaments were swollen, the structure was  
182 disorganized, and the color of the tissue was dark. From the images of knee MRI, we  
183 can also find that the signal of normal ACL on T2 phase is uniform and the structure  
184 is clear, while the signal of the ACL in the degenerated group is mixed, and the clear  
185 structure cannot be distinguished (supplementary figure 1 A and B). After rigorous  
186 quality control, we obtained the transcriptomes of 49356 cells (normal: 24635  
187 degenerated: 24721) and then employed differential gene expression analysis to  
188 discern cluster-specific markers. We firstly used principal component analysis (PCA)  
189 to reduce the dimension, and then we adopted uniform manifold approximation and  
190 projection (UMAP) method to conduct next analysis. Unbiased clustering based on  
191 UMAP identified four cell classes and histronic lineage-defining genes were detected,  
192 including endothelial cells: PECAM1, VWF, and PLVAP (3862, 7.83%), fibroblasts:  
193 DCN, LUM, and COL1A2 (32644, 66.14%), immune cells: PTPRC, SRGN, and  
194 CD163 (8021, 16.25%), and pericytes: ACTA2, MCAM, and RGS5 (4829, 9.78%)  
195 (figure 1 C-F and supplementary figure1 C). According to figure1 I, we were able to  
196 further confirm that the selected cell markers could well identify various cell types.  
197 UMAP plots and stacked bar plots in figure 1G described the distributions of cells in

198 the healthy and degenerated samples. We can conclude that, in general, fibroblasts are  
199 the main cell type in both normal and degenerated ligaments and the degenerated  
200 group had higher immune cells ratio and lower pericytes ratio compare with the  
201 normal group. We next analyzed the number of differentially expressed genes (Degs)  
202 between healthy and degenerated ligament clusters. The results demonstrated that the  
203 fibroblast had the largest difference, implying that fibroblasts undergo significant  
204 changes during the degenerative progress (figure 1 H). We also collected normal as  
205 well as degenerated ligament specimens for bulk sequencing and performed  
206 deconvolution analysis between bulk sequencing results and scRNA-seq results. The  
207 results illustrated that scRNA-seq samples were in good agreement with bulk  
208 sequencing samples (figure 1 J and K). After that, we verified the top 5 genes that  
209 were highly expressed in the degenerative state of the 4 cell subsets in the bulk  
210 sequencing results and these results also have a high consistency (supplementary 1  
211 D-G).

212

213 2. Characterizations of subpopulations of ligament fibroblasts between different  
214 kinds of tissue states

215 Because fibroblasts are known to play a vital role in ECM homeostasis and the  
216 degeneration of the ligament and undergo remarkable changes during the process of  
217 ligament degeneration, we next conducted further analysis of fibroblasts in normal  
218 and degenerated ligaments. We subclustered fibroblasts and identified 10 subsets  
219 (Fib.1-Fib.10) (figure 2A). The distribution shown in figure 2B indicated that the

220 batch effects are resolved well. As illustrated in figure 2C, we obtained the cell  
221 proportions of the fibroblast subpopulations between normal and diseased groups. We  
222 can conclude that the ratio of fibroblast subclusters varied greatly between these two  
223 groups. The ratio of Fib.1, Fib.2, Fib.8, and Fib.9 in the diseased group was obviously  
224 higher than that in the healthy group, and the ratio of Fib.3, Fib.4, and Fib.7 in the  
225 healthy group was obviously higher compare to the diseased group. The proportion of  
226 remaining fibroblast subclusters did not differ significantly between the two groups.

227 According to the analysis of Degs among these fibroblast subgroups, we tried to  
228 reveal the identity of each subpopulation (figure 2D). Combined with the analysis of  
229 the proportion of cell subclusters, we inferred that Fib.1 and Fib.2 are ECM  
230 remodeling associated fibroblasts as they highly expressed the genes related to ECM  
231 components and ECM decomposition such as COL1A1, CTHRC1, COL3A1, FBLN1,  
232 MMP2, MMP14 and TPPP3. From the perspective of ECM synthesis, Fib.1 and Fib.2  
233 are slightly different. Fib.1 highly expressed the collagen related genes, but Fib.2  
234 highly expressed the genes related to synthesis of connexins. Fib.3 expressing  
235 metallothionein family genes such as MT1X, MT1E, and MT1M is a population of  
236 homeostasis-associated fibroblasts with defensive functions. Fib.4 expressing genes  
237 associated with formation and organization of the ligamental ECM such as ANGPTL7,  
238 MYOC, CILP2 and THBS1 is a group of resident fibroblasts that function normally.

239 Fib.5 is a cluster of structural fibroblasts within the ligament as they highly expressed  
240 multiple collagen-related genes such as COL3A1, COL6A1, COL5A1, COL1A1, and  
241 TGFVBI. Fib.6 is a cluster of chondrocytes as they highly expressed cartilage related

242 genes such as COL2A1, FMOD, CHAD, ACAN, and CILP2. We cannot define Fib.7  
243 well, because they expressed Degr without specific tags. Fib.8 is a group of cycling  
244 cells as they highly expressed cell cycle related genes such as CENPF, TOP2A, and  
245 MLI67. Fib.9 is a group of inflammation related fibroblasts as they highly expressed  
246 CXCL14, CXCL12, C3, and C7. Fib.10 may have the function of damage repair as  
247 they highly expressed anti-inflammation and anti-ECM decomposing associated genes  
248 such as PRG4, DEFB1, TIMP3, and HBEGF.

249 For further in-depth investigation of changes in ligamental fibroblasts during the  
250 degeneration process, we performed the Degr analysis in the whole fibroblast  
251 population between the normal and degenerated ligaments. We observed genes  
252 upregulated in the degenerated group such as CFD, SPP1, COL1A2 and COL3A1,  
253 which were related to scar healing and ECM remodeling (figure 2E). Gene Ontology  
254 (GO) and Kyoto Encyclopedia of Genes and Genomes (KEGG) analysis were  
255 conducted for further functional interpretation of these Degr. The results illustrated  
256 that the upregulated genes in diseased group were enriched for the terms  
257 “extracellular region”, “TGF-beta signaling pathway” and “Complement and  
258 coagulation cascades” (figure 2F). Gene Set Enrichment Analysis (GSEA) also  
259 demonstrated that ECM associated signaling, ECM binding and ECM structural  
260 constituent, were activated in the degenerated group, which implied that the changes  
261 of ECM play an important role in the ligament degeneration (figure 2G). And then by  
262 building gene interaction networks, we identified that genes upregulated in  
263 degenerated groups were concentrated in two parts, ECM-receptor interaction and

264 leukocyte trans-endothelial migration, which once again proved the significant  
265 function of ECM remodeling and immune inflammation in the disease process (figure  
266 2H).

267

### 268 3. Dynamic transcriptional changes in ligamental degeneration

269 To gain insight into the cellular progression of fibroblast subclusters during the  
270 disease process, we performed cell trajectory analysis, revealing that two significant  
271 routes in the process of degeneration. Five fibroblast subclusters, including Fib.2,  
272 Fib.4, Fib.5, Fib.9, and Fib.10, were involved in reconstruction the disease trajectories  
273 using Monocle 3, an algorithm for the reconstruction of lineage programs based on  
274 similarity at the transcriptional level(Cao et al., 2019). We set Fib.4 and Fib.5 as the  
275 starting point of the trajectories due to they are structural fibroblasts with high  
276 expression of ECM component genes and represent normal ligamental functions well,  
277 and then computed pseudotime for cells along the inferred developmental axis (figure  
278 3A and B). More specifically, Fib.4 and Fib.5 were predicted to transformed into two  
279 distinct cell fate, including the cell fate1, which includes Fib.2 and Fib.9, and the cell  
280 fate2, which includes Fib.10. With this in mind, we tried to explore the genic  
281 dynamics that distinguished these two cell fates. The expression profile of cell fate1  
282 showed increasingly high expression of genes (CXCL12, MMP2, MMP14, C7)  
283 related to “leukocyte trans-endothelial migration”, “cellular response to chemokine”,  
284 and “inflammatory response pathway”. Along with the cell fate2, we observed  
285 gradually high expression of ECM organization and skeletal muscle tissue

286 development related genes (FOS, EGR1, FGF10, FN1) (figure 3C-H).

287 To investigate gene expression dynamics along the trajectories, we group genes that  
288 varied between cell clusters into Module 10 using Louvain community analysis. We  
289 can observe the aggregated expression of each module in the figure 3I. We identified  
290 that the expression of genes in module 3 was gradually elevated along the cell fate1  
291 and gradually declined along the cell fate2, which were enriched for genes related to  
292 rheumatoid arthritis, antigen processing and presentation and complement activation.  
293 In contrast, the expression of wound repair and ECM assembly related genes were  
294 gradually elevated along the cell fate2 but declined along the cell fate1, such as  
295 ADAM12, HS3ST3A1, FN1, and SERPINE2 in module 5 (figure 3I-K). According to  
296 these pseudotime analysis results, we inferred that there are two opposite dynamic  
297 trajectories in the process of ligament degeneration, one is the progressive damage  
298 process of complement inflammation leading to the continuous progression of the  
299 disease, and the other is the process of repairing the damage to delay or even reverse  
300 the disease process.

301

302 4. Characterization of stromal cells in coordinating ligament microenvironment  
303 during degeneration progression.

304

305 Besides fibroblasts, various endothelial cells (ECs) and immune cells also play  
306 significant roles in the occurrence and development of ligament degeneration.

307 In our ligament samples, we identified seven clusters of blood-vessel derived cells

308 including five clusters of ECs (EC1-5) and two clusters of pericytes (pericyte1 and  
309 pericyte2). Fig 4A shown the distribution of EC1 expressing high level of ACKR1 is a  
310 population of venous ECs; EC2 highly expressed COL4A1, COL4A2, H19 was  
311 related to anti-angiogenesis; EC3 highly expressed genes associated with ECM  
312 organization and we inferred this cluster related to damage repair. EC4 expressing  
313 high level of CCL2, CCL8, STEAP4 and SYNPO2 is a cluster of ECs related to  
314 inflammatory chemotaxis. EC5 is a cluster of lymphatic ECs. As for pericytes, we  
315 identified two populations expressed pericyte markers ACTA2, MCAM. Pericyte1  
316 highly expressed myocyte related genes such as MYH11, MUSTN1 and LBH, which  
317 implied that this cluster may have myocyte-like properties. Pericyte2 highly expressed  
318 fibroblast markers such as COL1A1 and COL3A1, which implied that this cluster  
319 may have fibroblast-like properties (figure 4G). We next compared the proportions of  
320 these 7 clusters between normal and diseased ligament (figure 4C and D). The results  
321 illustrated that most ECs subsets were elevated in the diseased group, implying  
322 increased angiogenesis during ligamental degeneration. The ratio of pericyte1 in the  
323 diseased group was higher than that in the healthy group, but the ratio of pericyte2  
324 was lower. Increased ratio of pericyte1 may change the tissue biological properties, as  
325 ligament was dominant by fibroblast. To gain more biological insights underlying ECs,  
326 we performed Degr analysis between normal and degenerated groups (figure 4E).  
327 Combined with the result of enrichment analysis and GSEA analysis, we identified  
328 that ligamental ECs upregulated inflammation and complement related genes, such as  
329 C1QA, PLA2G2A, and ECM related genes such as PRG4, VIM, and POSTN during

330 degeneration procession (figure 4H). The term “inflammation mediated by chemokine  
331 and cytokine signaling pathway” and “TGF-beta signaling pathway” activated in  
332 diseased group also implied that the inflammation and ECM remodeling have  
333 significant roles in the disease process (figure 4F).

334 As an indispensable cellular component in the ligament, we identified six  
335 subpopulations of immune cells, including basophils, CD8<sup>+</sup> NKT-like cells,  
336 macrophages, memory CD4<sup>+</sup> T cells, memory CD8<sup>+</sup> T cells, and myeloid dendritic  
337 cells (figure 4I and J). From figure 4K and L, we can conclude that macrophages are  
338 the most abundant immune cells in both normal and diseased groups and compared  
339 with the normal group, only the proportion of macrophages was increased in the  
340 degenerated group. We explored the gene profiling change of macrophages in the  
341 process of degeneration. As is shown in the violin plot figure 4M, we suggested that  
342 ECM remodeling related genes have higher expression level in the diseased group,  
343 such as PRG4, FN1 and HTRA1. The enrichment analysis also implied that ECM  
344 organization and complement and coagulation cascades were activated in the  
345 degenerated ligament, which was basically consistent with the results of ECs analysis  
346 (figure 4N ).

347

348 5. Putative signaling network for the intercellular crosstalk regulating the  
349 microenvironment homeostasis during ligamental degeneration

350 Elucidating the explicit interaction among fibroblasts, ECs and immune cells in the

351 ligamental microenvironment will shed light on the mechanisms of the pathogenesis



352 of ligamental degeneration. CellphoneDB and CellChat analysis were used to  
353 investigate the signaling network among the main cell clusters in the ligament. The  
354 heatmap illustrated the intensity of interactions among different cell clusters. From the  
355 results, we can find that in addition to interactions within fibroblast subclusters,  
356 cell-cell cross-talks were mainly between fibroblast subpopulations and ECs and  
357 between fibroblast subpopulations and macrophages. At the same time, we can find  
358 that fibroblast subsets dominated by the diseased group had stronger interaction  
359 associations with other cells, which implied that there are stronger and more complex  
360 interactions in degenerated ligaments (figure 5A).

361 To determine the important factors, we further analyzed the intercellular signaling  
362 networks of FGF and TGFB. Interestingly, Fib.9 was obviously involved in FGF  
363 signaling, both autocrine and paracrine (figure 5B). Fibroblasts were the leading  
364 receiver of FGF signals, as expected. Through the violin plot, we identified that Fib.9  
365 acts on FGFR1 located on each fibroblast subpopulation by expressing FGF7 and  
366 FGF signaling pathway can promote pathological proliferation of cells and participate  
367 in scar repair (figure 5D). We inferred that the FGF signaling network may disrupt the  
368 homeostasis of fibroblasts in the ligaments and promote the progression of ligamental  
369 degeneration. Moreover, the TGF- $\beta$  pathway was involved in many cell-cell  
370 interactions among fibroblasts subpopulations and macrophages via TGFB1-TGFBR1  
371 or TGFB1-TGFBR2 (figure 5C and E). As shown above, fibroblasts of the  
372 degenerated group highly expressed PRG4, COL3A1, and SSP1 and these genes all  
373 important downstream target of TGF- $\beta$ , which participate in the process of ECM

374 remodeling. Hence, we suggested that TGFBI is a key gene and macrophages promote  
375 the development of the disease may through this molecule.

376

377 6. SpRNA-seq of ligament deciphering the spatial interactions of cell subclusters

378 For further insight, multi-angle interpretation of the cell composition changes that

379 occurred in ligamental degeneration, we performed spRNA-seq on normal and

380 lesioned ligaments. Firstly, by using feature marker transfer method, we mapped the

381 individual subsets identified by single-cell sequencing into spatial transcriptome data.

382 The heatmap illustrated that Fib.6, as a representative of fibroblasts in normal

383 ligament tissue, was widely distributed in L1 and the amount was significantly higher

384 than that in L8. The number of Fib.13, as a representative of fibroblasts in

385 degenerated ligament, in L8 was obviously higher than that in L1 (figure 6A-D). We

386 also examined the immune cells and ECs. As expected, there were more immune cells

387 and ECs in L8 than in L1, implying immune infiltration and vascular hyperplasia were

388 presented in the degenerative specimens (figure 6E-J). These results are consistent

389 with those obtained by single cell sequencing. After that, we performed spotlight

390 analysis in these two groups. All cell subsets are rendered in four colors, with red

391 being the fibroblast subsets specific to the disease group. Finally, we hide the areas

392 that are not red in both samples. We can find that the red region in L8 was widely

393 distributed and the area was significantly higher than that in L1 group. And after

394 careful observation, we found that almost all the red dots had yellow and black areas

395 (figure 6K and L). This indicates that some fibroblast subpopulation specific to the

396 diseased group are adjacent to endothelial and immune cells in the degenerative state.  
397 The proximity of different cells in space makes it possible for them to interact with  
398 each other. Therefore, this further provided strong evidence for the results of our  
399 single-cell interaction analysis

400

## 401 **Discussion**

402 ACL degeneration can contribute to cartilage injury and even OA onset and  
403 progression and may put a great burden on the normal life of many  
404 patients(Georgoulis et al., 2010; Hasegawa et al., 2012). But the mechanisms of this  
405 disease are not well characterized and treatments to prevent or treat ACL degeneration  
406 are scarce and not effective(Shane Anderson & Loeser, 2010; Tozer & Duprez, 2005).  
407 Healthy and degenerated ACL tissues include multiple cell subpopulations with  
408 diverse genetic and phenotypic characteristics. How this heterogeneity emerges in  
409 development degeneration remains unclear. Herein, we built a single-cell atlas of  
410 normal and degenerated human ACL and explored the characteristics and key  
411 regulatory pathways of distinct fibroblast subtypes. These findings will help us  
412 understand the pathogenesis of ACL degeneration in depth, and provide potential  
413 targets for clinical therapies of this disease.

414 Fibroblasts are increasingly considered as dominating cell types in ligaments and  
415 central mediators of ligamental degeneration, and here we identified 10 fibroblast  
416 subpopulations in human normal and degenerated ACL samples by using scRNA-seq.  
417 Further cluster analysis profiled characteristics of each subclusters and combined with

418 the cell proportion analysis we found that pro-inflammation and ECM remodeling  
419 related fibroblast subgroups were significantly increased in the degenerative  
420 ligament tissues, which implied that inflammation and ECM remodeling are key  
421 events in the disease process. Through comparing the Degs of fibroblasts between  
422 degenerative and healthy conditions, we found that ECM related genes were  
423 upregulated in the diseased group such as FN1, COL3A1, PRG4 and SPP1. The  
424 results of enrichment analysis and GSEA also illustrated that ECM related pathways  
425 were activated in the degenerated group, which suggested that the modules of ECM  
426 play an important role in the process of ligament degeneration. According to the  
427 gene interaction analysis, two gene modules were activated in the diseased group,  
428 leukocyte trans-endothelial migration and ECM-receptor interaction. These findings  
429 were consistent with previous studies which suggested that ligament inflammation  
430 and ECM changes contribute to ACL degeneration(Busch et al., 2013; Hasegawa et al.,  
431 2012). It is due to the changes and remodeling of the ECM in the degenerative  
432 ligament tissue that the biomechanical changes of the ligament are caused and  
433 eventually may result in the rupture of the ligament. From the pseudotime analysis,  
434 we identified two cell fates in the ligament degeneration. Cell fate 1 represents a  
435 progressive process of disease characterized by inflammatory damage and  
436 extracellular matrix degradation. Cell fate 2 implies a chronic repair process for the  
437 disease characterized by ECM remodeling, ligament development, and damage repair.  
438 Immune cells are closely related to ligament degeneration(Kim-Wang et al.,  
439 2021). We analyzed the heterogeneity of immune cells in ACL using single-cell RNA

440 sequencing. The results illustrated that macrophages are dominating immune cells in  
441 ACL and inflammation related genes PLA2G2A and ECM related genes PRG4, FN1,  
442 and HTRA1 were upregulated in the macrophages of the diseased group. Enrichment  
443 analysis also revealed that complement and ECM related pathways were activated in  
444 the degenerated group. This implied that macrophages highly expressed ECM and  
445 inflammation associated genes in the ligamental degeneration progression. So, we  
446 suggested that macrophages may contribute to the ligamental degeneration. We also  
447 identified two types of pericytes in these tissues. As we all know, pericyte in the tissue  
448 have some stem cell characteristics and can differentiate into fibroblasts, and  
449 chondrocytes(Armulik, Genové, & Betsholtz, 2011; Smyth et al., 2018). Pericyte 1  
450 highly expressed stem cell related genes MCAM, MUSTN1 and have the  
451 characteristics of myofibroblasts and pericyte 2 tend to have the characteristics of  
452 fibroblasts. Pericyte 1 was increased and pericyte 2 decreased in the degenerated  
453 group, which may change the properties of ligamental cells and contribute to the  
454 ligamental degeneration.

455 Cells can communicate via ligand-receptor interactions(Kumar et al., 2018), so  
456 targeting cell-cell interactions is frequently utilized in the clinical treatment. The  
457 results of CellphoneDB analysis demonstrated that the high content of fibroblasts and  
458 immune cells in the degenerative group had significantly higher interaction intensity,  
459 such as fibroblast 1,2, and 8, which means that the interaction between cells in the  
460 ligament was enhanced in the degenerative state. To identify the key factors regulating  
461 the disease process, CellChat analysis was used to dissect the intercellular crosstalk

462 based on the signaling network in the human ACL. We found that FGF signaling  
463 pathway and TGF- $\beta$  signaling pathway were involved in the crosstalk network.  
464 TGF $\beta$ 1, contributes to osteophyte formation by inducing endochondral ossification, is  
465 thought to be closely related to the onset of OA(Murata et al., 2019) and can be used  
466 to induce chondrogenic differentiation of ligament-derived stem cells in  
467 vitro(Schwarz et al., 2019). It has been reported that in myocardial fibrosis, liver  
468 fibrosis, glaucoma and other diseases, TGF- $\beta$  signaling pathway is also involved in  
469 angiogenesis, ECM remodeling, pathological scar healing(Ilieş et al., 2021; Lee &  
470 Massagué, 2022; P et al., 2018; Penn, Grobbelaar, & Rolfe, 2012). FGFs can induce  
471 the fibroblast to myofibroblast differentiation, promote tissue repair by regulating cell  
472 proliferation, survival and angiogenesis and contribute to ECM remodeling(Kendall &  
473 Feghali-Bostwick, 2014; Ma, Iyer, Jung, Czubryt, & Lindsey, 2017). ECM  
474 remodeling by overexpression, degradation and cross-linking of ECM proteins in the  
475 lesioned tissue are direct factors leading to fibrosis tissues(Sun et al., 2022). In this  
476 study, we observed that fibroblast9, inflammation related fibroblast, highly expressed  
477 FGF7 and can act on FGFR1 mainly distributed in the fibroblast subgroups. Immune  
478 cells especially macrophages highly expressed TGFB1 and can act on TGFBR1 and  
479 TGFBR2 mainly distributed in the fibroblast and endothelial subgroups. These  
480 findings suggested that FGF and TGF- $\beta$  signaling pathways may induce ECM  
481 remodeling in the process of ligamental degeneration and FGF7-FGFR1 and  
482 TGFB1-TGFBR2 may be potential targets for the treatment of this disease.  
483 SpRNA-seq was used to detect the spatial information underlying the normal and

484 degenerated ligaments and validate the findings acquiring from the ScRNA-seq.  
485 Through the results, we observed that the disease group specific fibroblasts and  
486 immune cells recognized by single cells were more numerous and more widely  
487 distributed in the disease group specimens. We also get some spatial information, that  
488 fibroblasts in the disease group were spatially closer to immune and endothelial cells,  
489 which was more conducive to cell interaction.

490

#### 491 **Conclusions**

492 In conclusion, our study described the cell atlas of the human ligament, providing a  
493 valuable resource for further investigate of ACL homeostasis and the pathogenesis of  
494 ligamental degeneration. The cellular heterogeneity and signaling network we  
495 uncovered help to increase the understanding of the human ACL at a single-cell level  
496 and provide crucial clues for establishing new diagnostic and therapeutic strategies for  
497 this disease in the future.

498

#### 499 **Declarations**

##### 500 **Ethics approval and consent to participate**

501 This study was reviewed and approved by our University Ethics Committee (Ethics  
502 Committee on Biomedical Research, West China Hospital of Sichuan University No.  
503 658 2020-(921)) and all procedures complied with the Helsinki Declaration.  
504 Participants gave informed consent to participate in the study.

##### 505 **Consent for publication**

506 Not applicable.

507 **Conflict of interests**

508 The authors declared that they have no competing interests.

509 **Availability of data and materials:**

510 Data are available in a public, open-access repository. The single-cell RNA-seq data

511 and cluster annotations are available at GSA for human

512 (<https://ngdc.cncb.ac.cn/gsa-human/>) with the accession number PRJCA014157.

513 **Competing interests:**

514 The authors declared that they have no competing interests.

515 **Author's Contributions:**

516 WF and JL conceived the project. WF and JL designed the experiments. WF, RY and

517 MG collected the specimens. RY, TX, LZ and LY performed bioinformatic and

518 statistical analyses. WF and RY wrote the manuscripts. All authors commented and

519 revised the manuscripts.

520 **Acknowledgements:**

521 We appreciate all patients who participated in this study.

522

523

524

525

526

527



528

529

530

531

532

533

534

535 **Figure legends :**

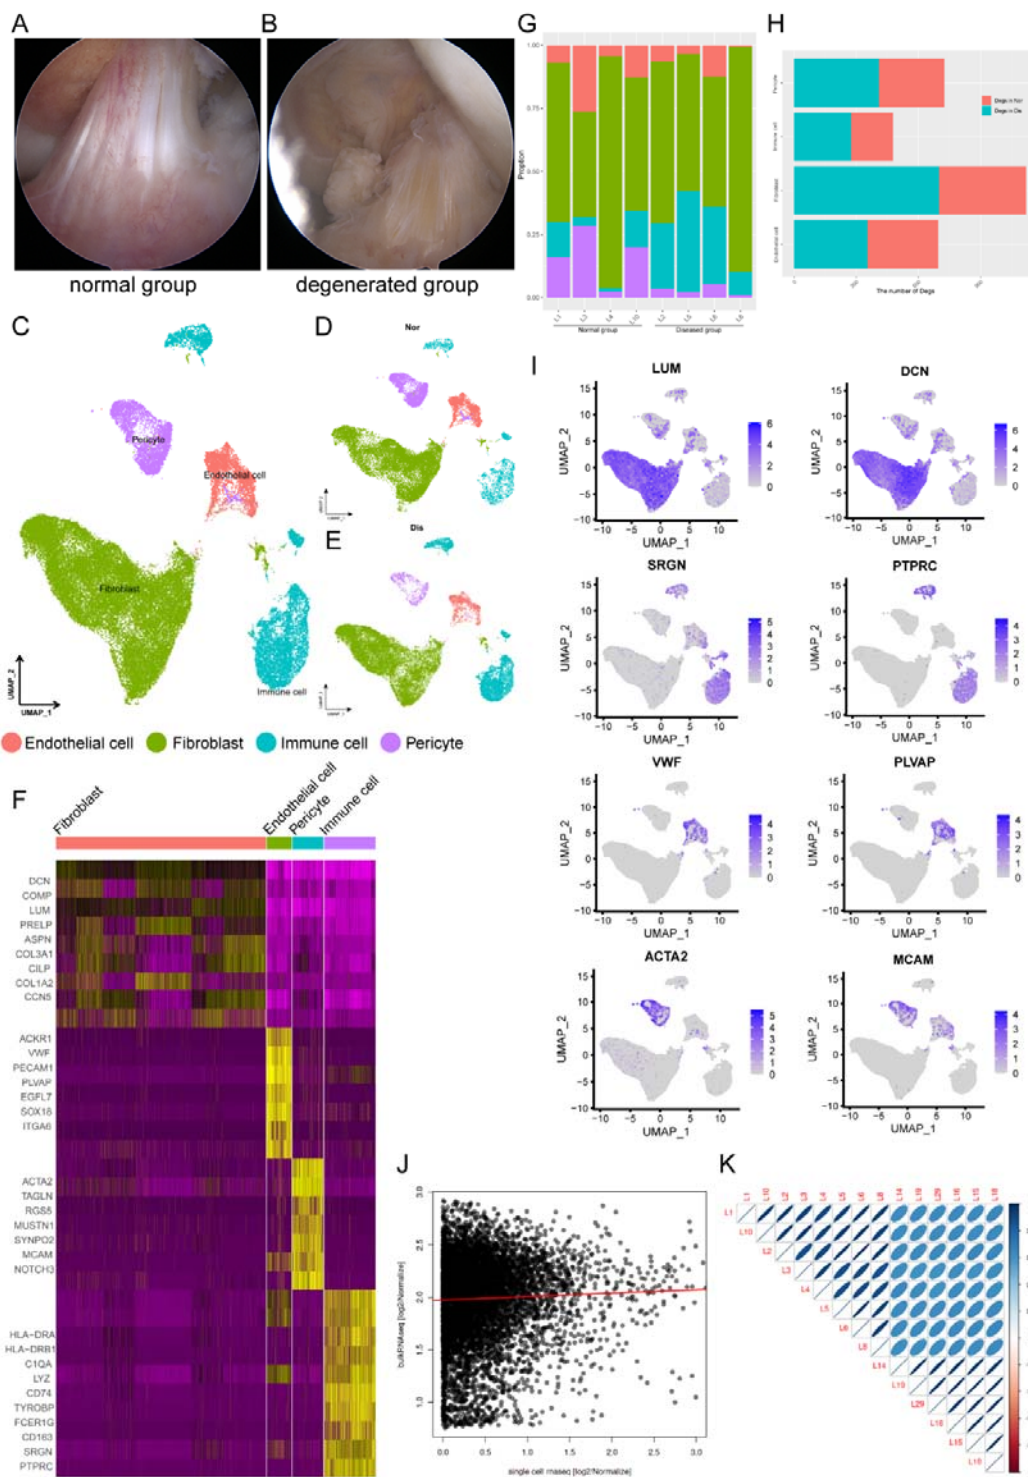

536

537 Figure1: Single-cell RNA-seq reveals major cell classes in human ligament

538 A and B: A photograph of typical normal (left) and degenerated (right) anterior

539 cruciate ligaments (ACL) under arthroscope. C: UMAP visualization of all cell

540 clusters in collected ligament specimens. D and E: UMAP visualization of the donor  
541 origins in normal/diseased samples. F: Heatmap of selected marker genes in each cell  
542 cluster. G: The percentages of the identified cell classes in normal/diseased ligament.  
543 H: Number of differentially expressed genes (DEGs) in each cell type of  
544 normal/diseased status. I: Feature plots of expression distribution for selected  
545 cluster-specific genes. Brighter colors indicate higher expression levels. J: Gene  
546 expression profiles from bulk samples ( $n = 6$ ) and in single cell samples ( $n = 8$ ) were  
547 averaged and plotted on X and Y axes, respectively. Red lines indicate linear model fit  
548 and the diagonal. K: Correlation heatmap shows Pearson's correlation between all  
549 bulk and in single cell samples.

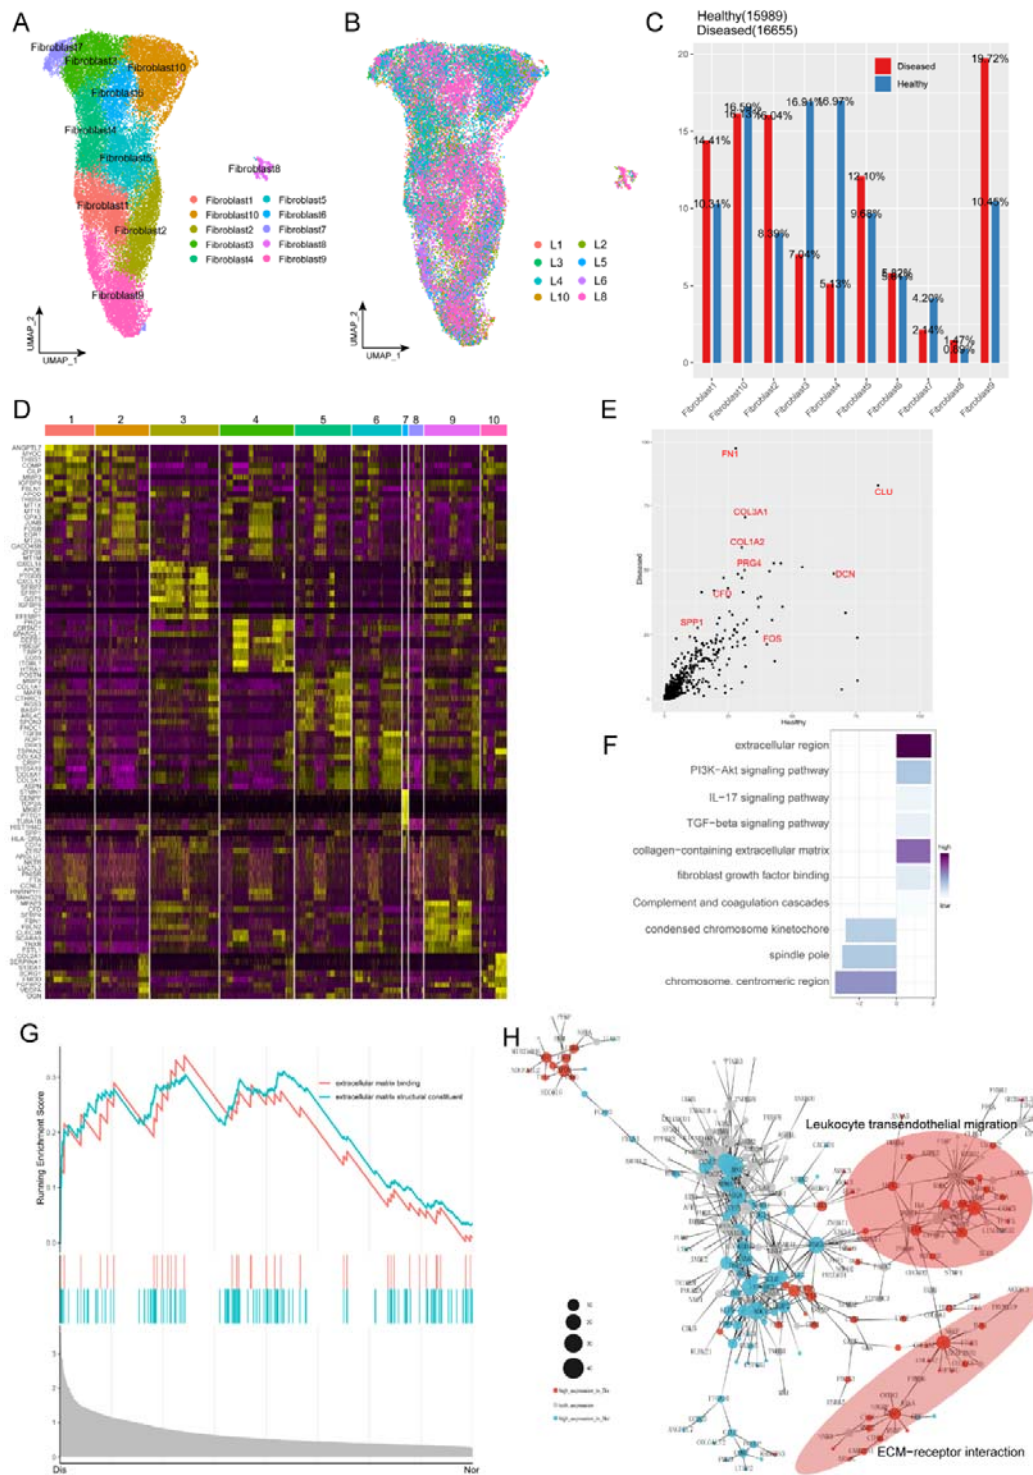

550

551

552 Figure2: Characterization of fibroblast subclusters across different statuses in human

553 ACL

554 A: UMAP visualization of the subclusters of fibroblasts. B: UMAP visualization of  
555 the distribution of fibroblast subclusters at different samples. C: The proportions of 10  
556 fibroblast subpopulations in normal and diseased ligaments. D: A cell-level heatmap  
557 reveals the normalized expression of DEGs for each fibroblast cluster defined in. E:  
558 Volcano plot showing the DEGs between two statues of ligamental fibroblasts. The x  
559 axis represents highly expressed genes in normal cells, and the y axis represents  
560 highly expressed genes in diseased cells. F: GO and KEGG enrichment analysis of  
561 DEGs in ligamental fibroblasts between normal and degenerated states. G: GSEA  
562 enrichment plots for representative signaling pathways upregulated in fibroblasts of  
563 diseased samples, compared with normal samples. H: Gene-gene interaction networks  
564 between DEGs in ligamental fibroblasts of normal group and fibroblasts of diseased  
565 group.

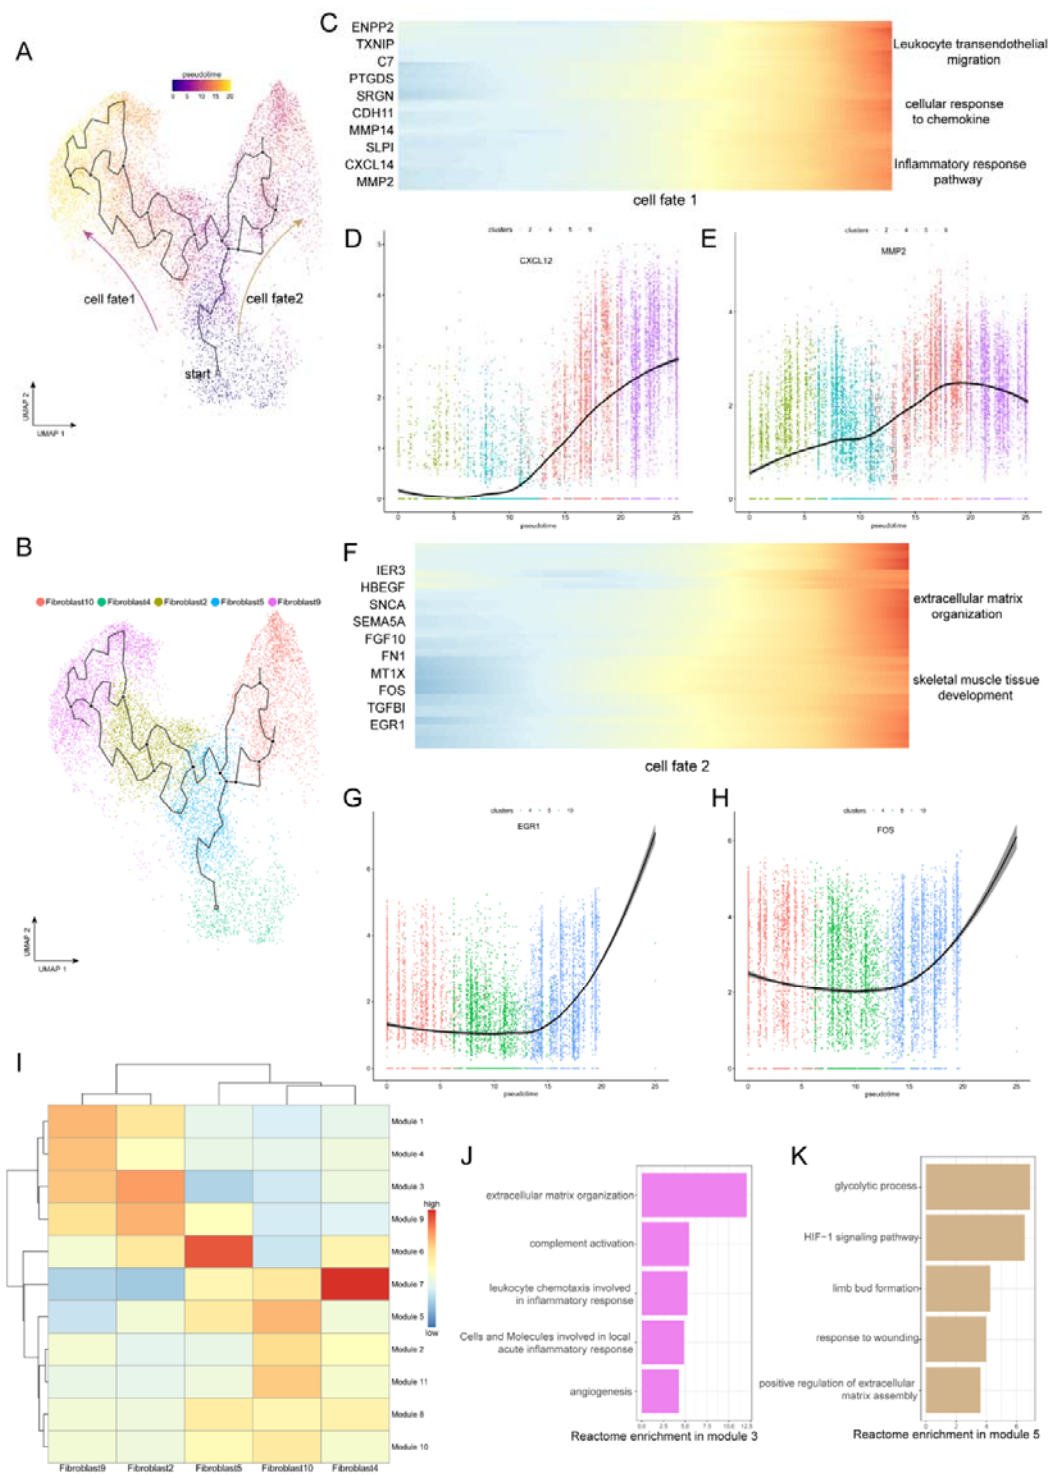

566

567 Figure3: Evolution trajectory and transcriptional fluctuation during ligament  
 568 degeneration progression

569 A and B: UMAP visualization of fibroblast 2,4,5,9,10. Developmental pseudotime for

570 cells present along the trajectory inferred by Monocle 3, with cell fate1 and cell fate2  
571 branches coming from fibroblast 4. C: Heatmap showing the expression changes of  
572 the highly variable genes along the cell fate1 in normal and degenerated groups. D  
573 and E: Representative gene expression levels along cell fate1 trajectory of normal and  
574 diseased statuses. F: Heatmap showing the expression changes of the highly variable  
575 genes along the cell fate2 in normal and degenerated groups. G and H: Representative  
576 gene expression levels along cell fate2 trajectory of normal and diseased statuses. I:  
577 Heatmap showing the scaled mean expression of modules of coregulated genes  
578 grouped by Louvain community analysis across the subclusters. J and K: Enrichment  
579 analysis results of Module 3 and 5.

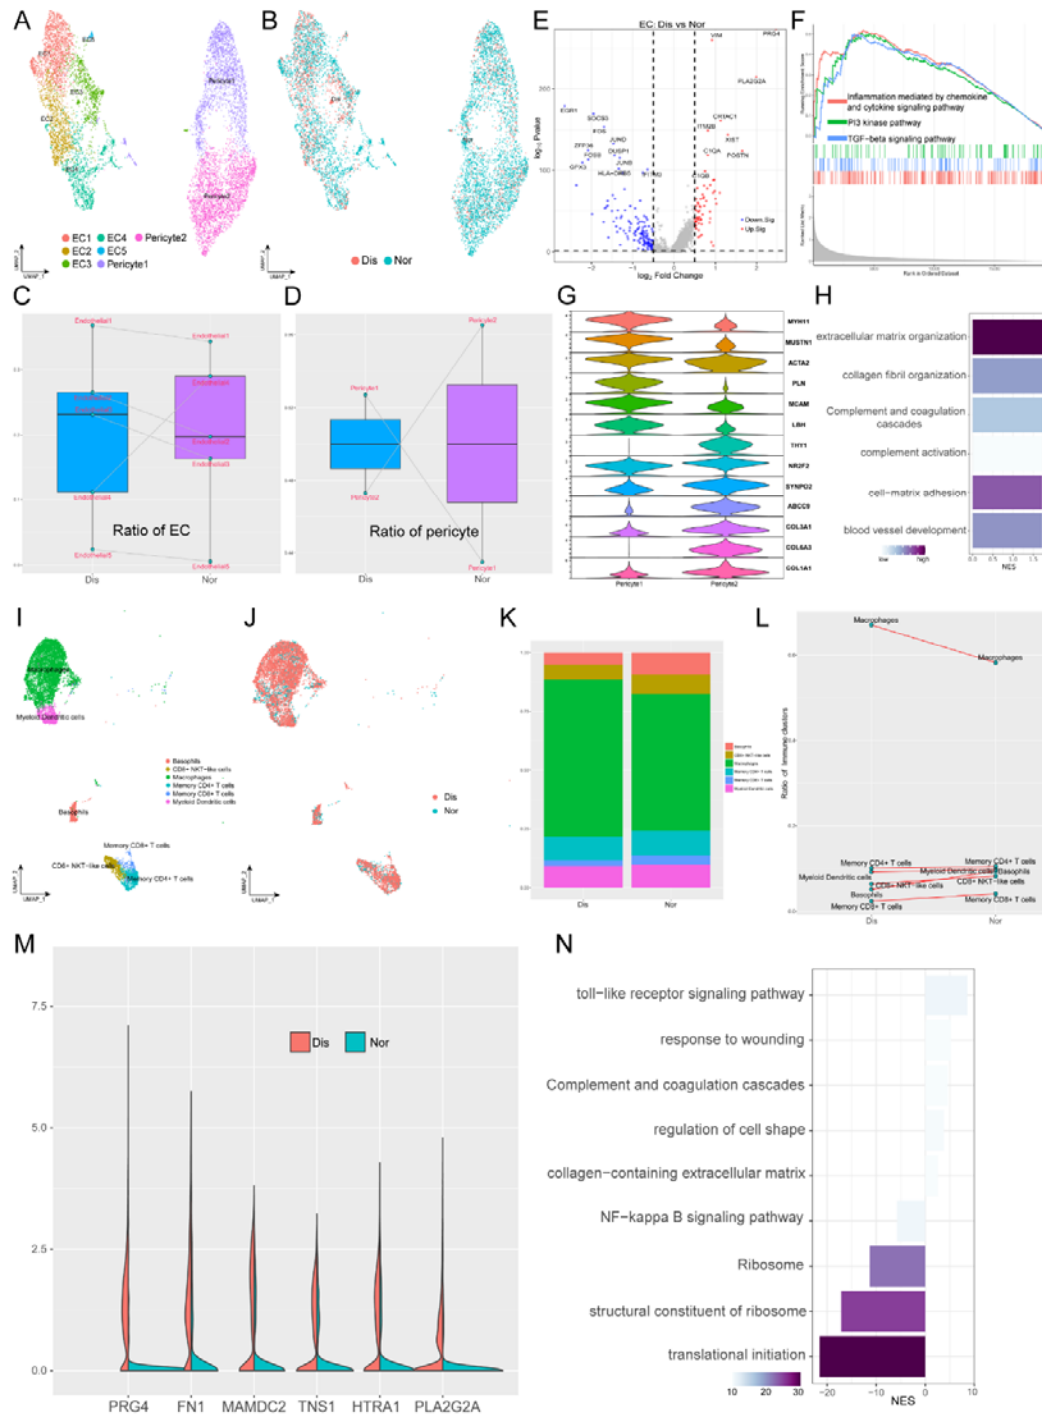

580

581 Figure4: Identification of blood vessel derived cell and immune cell subclusters in  
 582 human ligament.

583 A: UMAP visualization of the subclusters of endothelial cell and pericyte. B: UMAP



584 visualization of the distribution of endothelial cell and pericyte subclusters at different  
585 sample statuses. C and D: Summarized subpopulations of endothelial cell and pericyte  
586 percentage changes. E: Volcano plots displaying the DEGs in endothelial cell between  
587 normal group and diseased group. Each dot represented one gene. Red dots,  
588 differentially up-regulated genes; blue dots, differentially down-regulated genes; gray  
589 dot, non-differentially expressed genes. F: GSEA enrichment plots for representative  
590 signaling pathways upregulated in endothelial cell of diseased samples, compared  
591 with normal samples. G: Violin plots showing representative marker genes associated  
592 with different types of pericyte expressed in pericyte1 and pericyte2. H: GO and  
593 KEGG enrichment analysis of DEGs between normal and diseased endothelial cells. I:  
594 UMAP visualization of the subclusters of immune cell. J: UMAP visualization of the  
595 distribution of immune cell subclusters at different sample statuses. K: The proportion  
596 of each subcluster of immune cells in the lesioned and normal ligament. L:  
597 Summarized subpopulations of immune cell percentage changes. M: Violin plots  
598 showing representative genes of macrophages between normal and degenerated states.  
599 N: GO and KEGG enrichment analysis of DEGs between normal and diseased  
600 macrophages.

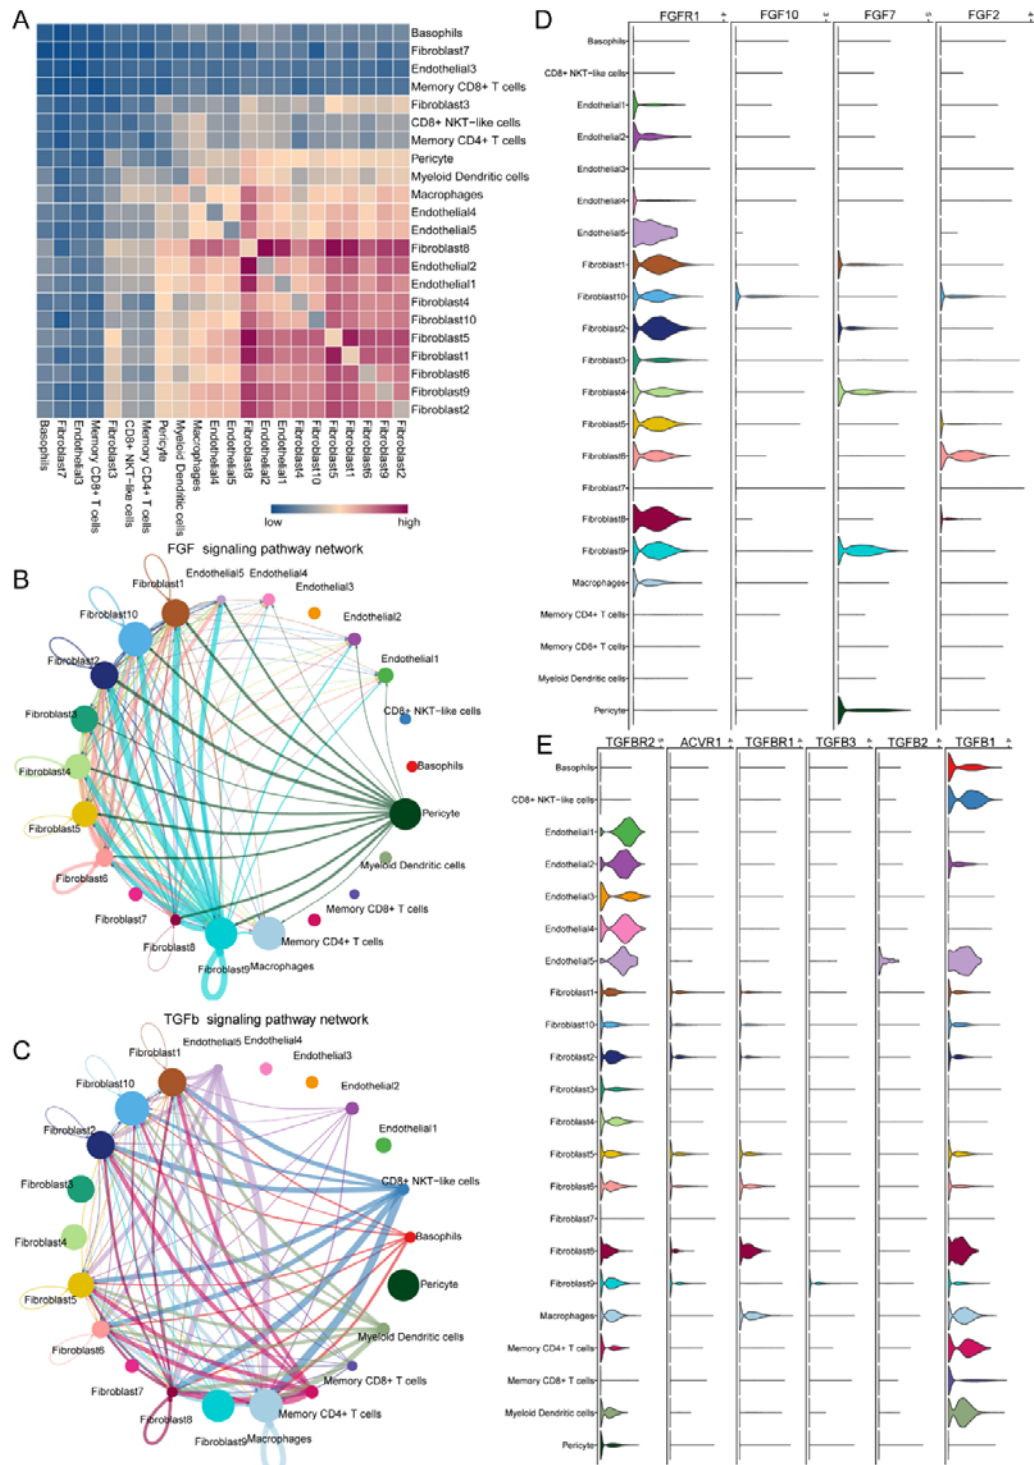

601

602 Figure5: Cell-cell crosstalk during ligamental degeneration progression

603 A: Heatmap depicting the significant interactions among the identified subclusters of

604 fibroblast, immune cell, and endothelial cell. B and C: Circle plots showing the

605 inferred TGF- $\beta$  and FGF signaling networks. D and E: Violin plots showing  
 606 ligand-receptor interactions related to TGF- $\beta$  and FGF signaling pathways among  
 607 subclusters of fibroblast, endothelial cell and immune cell.

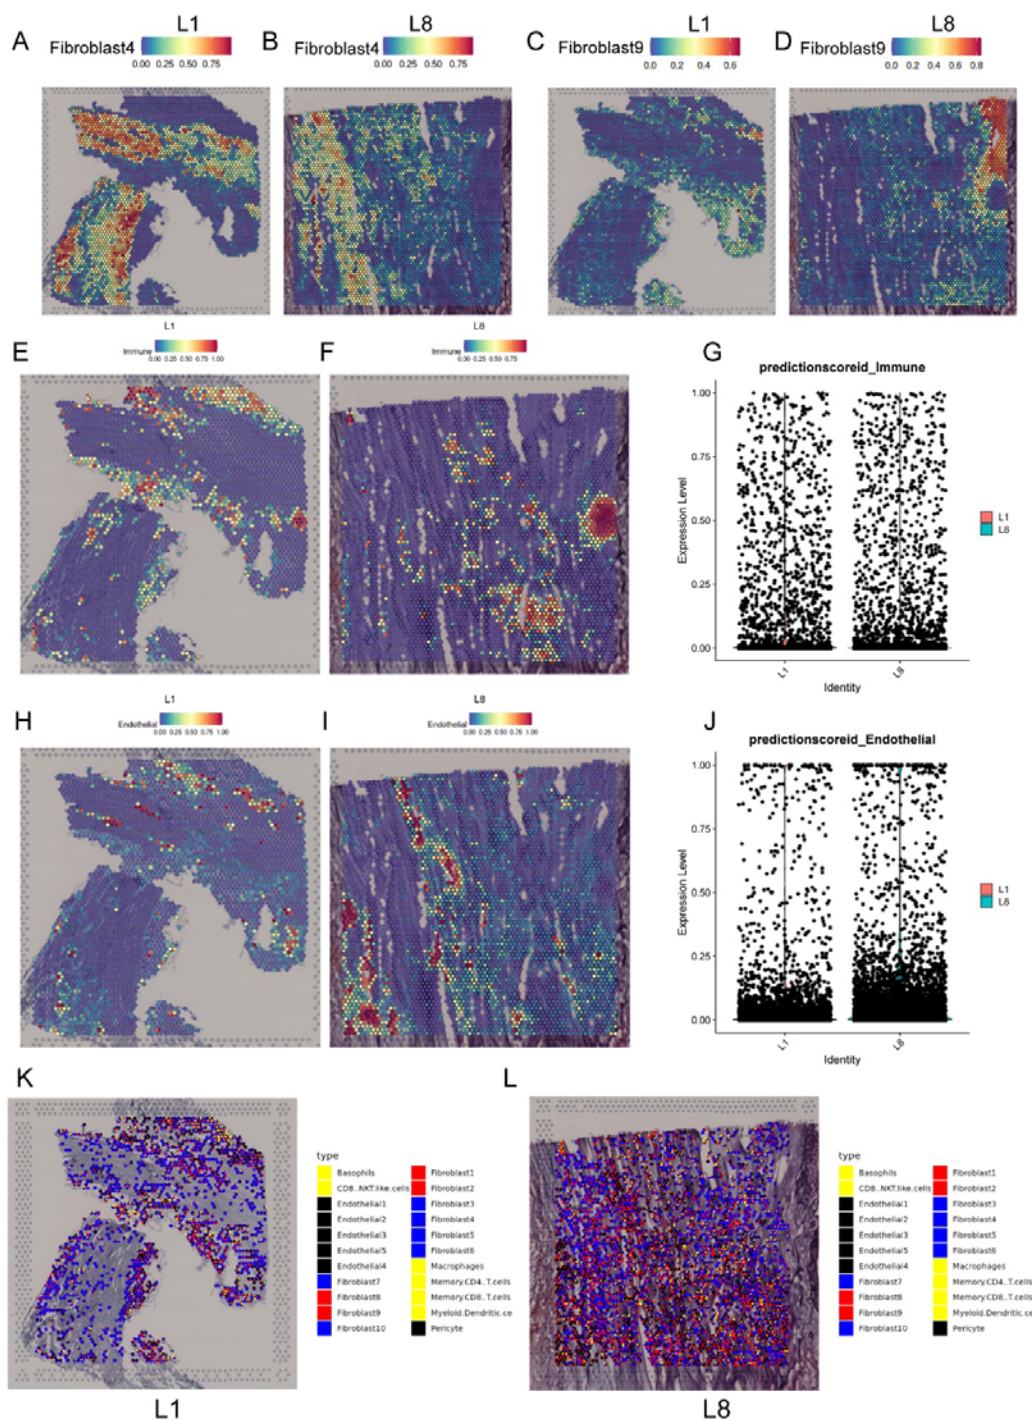

608

609 Figure6: Spatial transcriptome sequencing deciphers the microenvironment changes  
610 during ligamental degeneration progression  
611 A-D: Spatial heatmaps showing the representative normal and degenerated fibroblast  
612 subcluster distribution in L1 and L8 samples. E and F: Spatial heatmaps showing the  
613 immune cells distribution in normal and degenerated ligamental samples. G:  
614 Quantitative analysis of immune cells in these two types of tissues. H and I: Spatial  
615 heatmaps showing the endothelial cells distribution in normal and degenerated  
616 ligamental samples. J: Quantitative analysis of endothelial cells in these two types of  
617 tissues. K and L: Spot light showing fibroblast subpopulation unique to diseased  
618 samples proportion in L1 and L8 samples.  
619

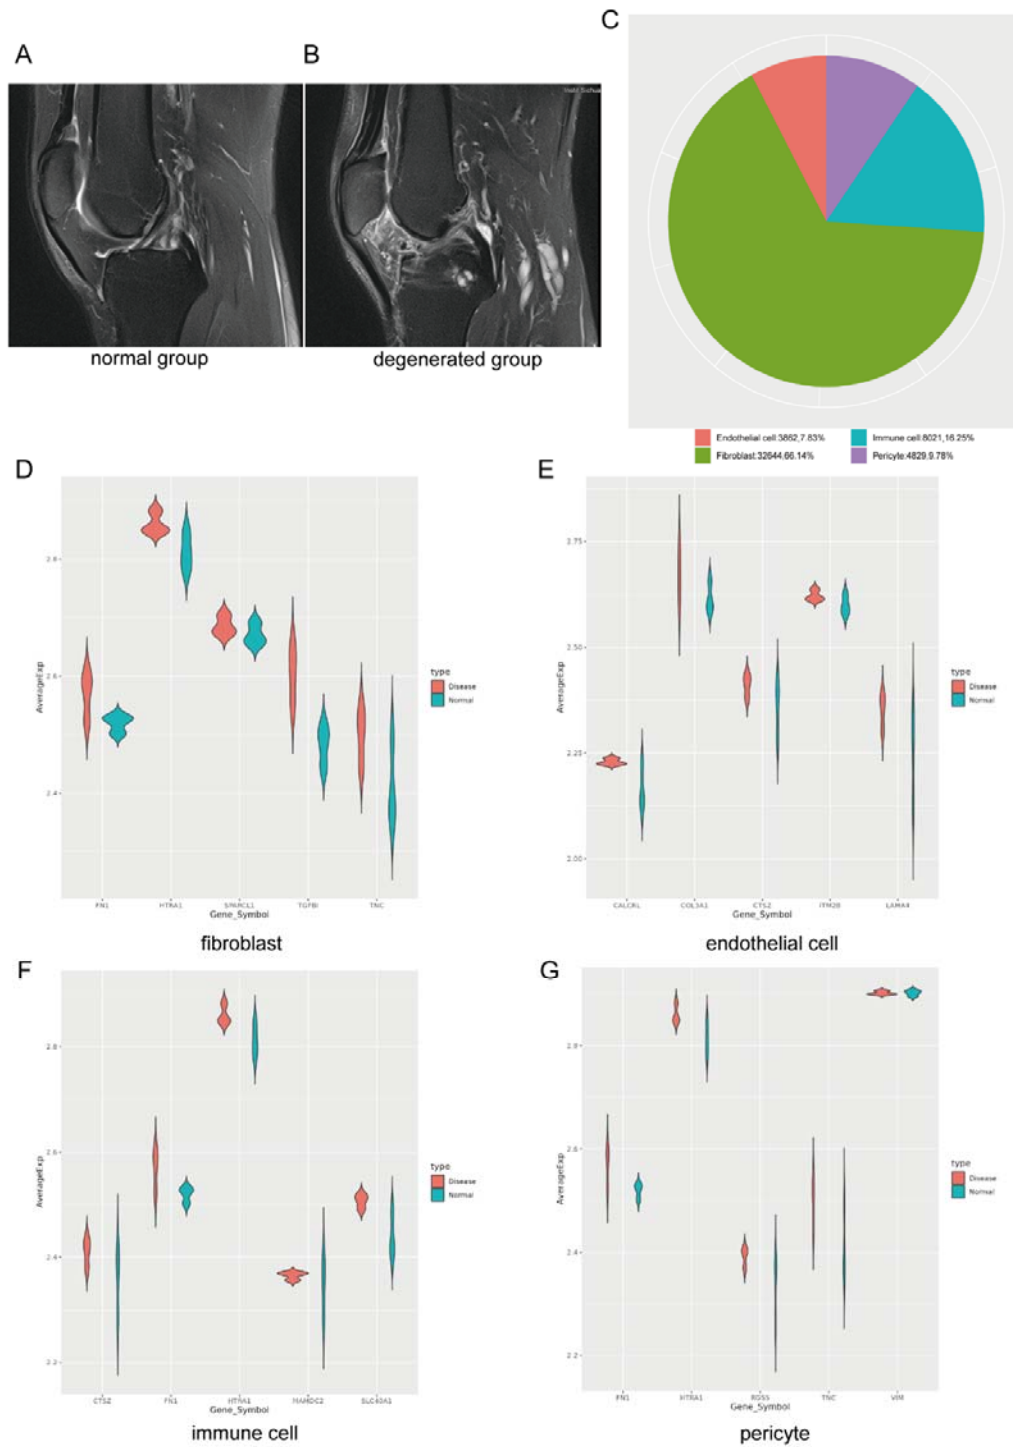

620

621 Supplementary figure1: A and B: MRI Photographs of typical normal and degenerated

622 ACLs. C: The proportion of each cell type. D-G: The expression of the top five genes

623 highly expressed in degenerated state obtained by single cell sequencing of fibroblast,

624 endothelial cell, immune cell and pericyte in bulk sequencing data.

625

## 626 **References**

627 Armulik, A., Genové, G., & Betsholtz, C. (2011). Pericytes: developmental, physiological, and

628 pathological perspectives, problems, and promises. *Dev Cell*, *21*(2), 193-215.

629 doi:10.1016/j.devcel.2011.07.001

630 Beard, J. R., & Bloom, D. E. (2015). Towards a comprehensive public health response to

631 population ageing. *Lancet*, *385*(9968), 658-661. doi:10.1016/s0140-6736(14)61461-6

632 Briggs, A. M., Cross, M. J., Hoy, D. G., Sánchez-Riera, L., Blyth, F. M., Woolf, A. D., & March,

633 L. (2016). Musculoskeletal Health Conditions Represent a Global Threat to Healthy

634 Aging: A Report for the 2015 World Health Organization World Report on Ageing and

635 Health. *Gerontologist*, *56 Suppl 2*, S243-255. doi:10.1093/geront/gnw002

636 Busch, C., Girke, G., Kohl, B., Stoll, C., Lemke, M., Krasnici, S., . . . Schulze-Tanzil, G. (2013).

637 Complement gene expression is regulated by pro-inflammatory cytokines and the

638 anaphylatoxin C3a in human tenocytes. *Mol Immunol*, *53*(4), 363-373.

639 doi:10.1016/j.molimm.2012.09.001

640 Cao, J., Spielmann, M., Qiu, X., Huang, X., Ibrahim, D. M., Hill, A. J., . . . Shendure, J. (2019).

641 The single-cell transcriptional landscape of mammalian organogenesis. *Nature*,

642 *566*(7745), 496-502. doi:10.1038/s41586-019-0969-x

643 Corps, A. N., Robinson, A. H., Movin, T., Costa, M. L., Hazleman, B. L., & Riley, G. P. (2006).

644 Increased expression of aggrecan and biglycan mRNA in Achilles tendinopathy.

645 *Rheumatology (Oxford)*, *45*(3), 291-294. doi:10.1093/rheumatology/kei152

- 646 Fleming, B. C. (2003). Biomechanics of the anterior cruciate ligament. *J Orthop Sports Phys*  
647 *Ther*, 33(8), A13-15.
- 648 Frank, C. B. (2004). Ligament structure, physiology and function. *J Musculoskelet Neuronal*  
649 *Interact*, 4(2), 199-201.
- 650 Georgoulis, A. D., Ristanis, S., Moraiti, C. O., Paschos, N., Zampeli, F., Xergia, S., . . .  
651 Mitsionis, G. (2010). ACL injury and reconstruction: Clinical related in vivo  
652 biomechanics. *Orthop Traumatol Surg Res*, 96(8 Suppl), S119-128.  
653 doi:10.1016/j.otsr.2010.09.004
- 654 Hasegawa, A., Nakahara, H., Kinoshita, M., Asahara, H., Koziol, J., & Lotz, M. K. (2013).  
655 Cellular and extracellular matrix changes in anterior cruciate ligaments during human  
656 knee aging and osteoarthritis. *Arthritis Res Ther*, 15(1), R29. doi:10.1186/ar4165
- 657 Hasegawa, A., Otsuki, S., Pauli, C., Miyaki, S., Patil, S., Steklov, N., . . . Lotz, M. K. (2012).  
658 Anterior cruciate ligament changes in the human knee joint in aging and osteoarthritis.  
659 *Arthritis Rheum*, 64(3), 696-704. doi:10.1002/art.33417
- 660 Hayashi, K., Frank, J. D., Hao, Z., Schamberger, G. M., Markel, M. D., Manley, P. A., & Muir, P.  
661 (2003). Evaluation of ligament fibroblast viability in ruptured cranial cruciate ligament  
662 of dogs. *Am J Vet Res*, 64(8), 1010-1016. doi:10.2460/ajvr.2003.64.1010
- 663 Ilie, R. F., Aioanei, C. S., Cătană, A., Halmagyi, S. R., Lukacs, I., Tokes, R. E., . . . Pop, I. V.  
664 (2021). Involvement of COL5A2 and TGF- $\beta$ 1 in pathological scarring. *Exp Ther Med*,  
665 22(4), 1067. doi:10.3892/etm.2021.10501
- 666 Kendall, R. T., & Feghali-Bostwick, C. A. (2014). Fibroblasts in fibrosis: novel roles and  
667 mediators. *Front Pharmacol*, 5, 123. doi:10.3389/fphar.2014.00123

- 668 Kharaz, Y. A., Canty-Laird, E. G., Tew, S. R., & Comerford, E. J. (2018). Variations in internal  
669 structure, composition and protein distribution between intra- and extra-articular knee  
670 ligaments and tendons. *J Anat*, *232*(6), 943-955. doi:10.1111/joa.12802
- 671 Kim-Wang, S. Y., Holt, A. G., McGowan, A. M., Danyluk, S. T., Goode, A. P., Lau, B. C., . . .  
672 McNulty, A. L. (2021). Immune cell profiles in synovial fluid after anterior cruciate  
673 ligament and meniscus injuries. *Arthritis Res Ther*, *23*(1), 280.  
674 doi:10.1186/s13075-021-02661-1
- 675 Kumar, M. P., Du, J., Lagoudas, G., Jiao, Y., Sawyer, A., Drummond, D. C., . . . Raue, A.  
676 (2018). Analysis of Single-Cell RNA-Seq Identifies Cell-Cell Communication  
677 Associated with Tumor Characteristics. *Cell Rep*, *25*(6), 1458-1468.e1454.  
678 doi:10.1016/j.celrep.2018.10.047
- 679 Laurencin, C. T., & Freeman, J. W. (2005). Ligament tissue engineering: an evolutionary  
680 materials science approach. *Biomaterials*, *26*(36), 7530-7536.  
681 doi:10.1016/j.biomaterials.2005.05.073
- 682 Lee, J. H., & Massagué, J. (2022). TGF- $\beta$  in Developmental and Fibrogenic EMTs. *Semin*  
683 *Cancer Biol*. doi:10.1016/j.semcancer.2022.09.004
- 684 Li, X., & Wang, C. Y. (2021). From bulk, single-cell to spatial RNA sequencing. *Int J Oral Sci*,  
685 *13*(1), 36. doi:10.1038/s41368-021-00146-0
- 686 Loeser, R. F. (2010). Age-related changes in the musculoskeletal system and the  
687 development of osteoarthritis. *Clin Geriatr Med*, *26*(3), 371-386.  
688 doi:10.1016/j.cger.2010.03.002
- 689 Ma, Y., Iyer, R. P., Jung, M., Czubryt, M. P., & Lindsey, M. L. (2017). Cardiac Fibroblast



- 690           Activation Post-Myocardial Infarction: Current Knowledge Gaps. *Trends Pharmacol*  
691           *Sci*, 38(5), 448-458. doi:10.1016/j.tips.2017.03.001
- 692   Murata, K., Kokubun, T., Onitsuka, K., Oka, Y., Kano, T., Morishita, Y., . . . Kanemura, N.  
693           (2019). Controlling joint instability after anterior cruciate ligament transection inhibits  
694           transforming growth factor-beta-mediated osteophyte formation. *Osteoarthritis*  
695           *Cartilage*, 27(8), 1185-1196. doi:10.1016/j.joca.2019.03.008
- 696   P, M. F., L, M. N., O, C. M., M, G. L., Pereira, M. C., de Mendonça-Lima, L., . . . L, R. G. (2018).  
697           Inhibition of TGF- $\beta$  pathway reverts extracellular matrix remodeling in T. cruzi-infected  
698           cardiac spheroids. *Exp Cell Res*, 362(2), 260-267. doi:10.1016/j.yexcr.2017.11.026
- 699   Penn, J. W., Grobbelaar, A. O., & Rolfe, K. J. (2012). The role of the TGF- $\beta$  family in wound  
700           healing, burns and scarring: a review. *Int J Burns Trauma*, 2(1), 18-28.
- 701   Roos, H., Adalberth, T., Dahlberg, L., & Lohmander, L. S. (1995). Osteoarthritis of the knee  
702           after injury to the anterior cruciate ligament or meniscus: the influence of time and age.  
703           *Osteoarthritis Cartilage*, 3(4), 261-267. doi:10.1016/s1063-4584(05)80017-2
- 704   Schulze-Tanzil, G. (2019). Intraarticular Ligament Degeneration Is Interrelated with Cartilage  
705           and Bone Destruction in Osteoarthritis. *Cells*, 8(9). doi:10.3390/cells8090990
- 706   Schwarz, S., Gögele, C., Ondruschka, B., Hammer, N., Kohl, B., & Schulze-Tanzil, G. (2019).  
707           Migrating Myofibroblastic Iliotibial Band-Derived Fibroblasts Represent a Promising  
708           Cell Source for Ligament Reconstruction. *Int J Mol Sci*, 20(8).  
709           doi:10.3390/ijms20081972
- 710   Shane Anderson, A., & Loeser, R. F. (2010). Why is osteoarthritis an age-related disease?  
711           *Best Pract Res Clin Rheumatol*, 24(1), 15-26. doi:10.1016/j.berh.2009.08.006

- 712 Smyth, L. C. D., Rustenhoven, J., Scotter, E. L., Schweder, P., Faull, R. L. M., Park, T. I. H., &  
713 Dragunow, M. (2018). Markers for human brain pericytes and smooth muscle cells. *J*  
714 *Chem Neuroanat*, *92*, 48-60. doi:10.1016/j.jchemneu.2018.06.001
- 715 Sun, C., Tian, X., Jia, Y., Yang, M., Li, Y., & Fernig, D. G. (2022). Functions of exogenous FGF  
716 signals in regulation of fibroblast to myofibroblast differentiation and extracellular  
717 matrix protein expression. *Open Biol*, *12*(9), 210356. doi:10.1098/rsob.210356
- 718 Thompson, S., Salmon, L., Waller, A., Linklater, J., Roe, J., & Pinczewski, L. (2015).  
719 Twenty-year outcomes of a longitudinal prospective evaluation of isolated endoscopic  
720 anterior cruciate ligament reconstruction with patellar tendon autografts. *Am J Sports*  
721 *Med*, *43*(9), 2164-2174. doi:10.1177/0363546515591263
- 722 Tozer, S., & Duprez, D. (2005). Tendon and ligament: development, repair and disease. *Birth*  
723 *Defects Res C Embryo Today*, *75*(3), 226-236. doi:10.1002/bdrc.20049
- 724 Wen, L., & Tang, F. (2018). Boosting the power of single-cell analysis. *Nat Biotechnol*, *36*(5),  
725 408-409. doi:10.1038/nbt.4131
- 726 Zeng, Y., He, J., Bai, Z., Li, Z., Gong, Y., Liu, C., . . . Liu, B. (2019). Tracing the first  
727 hematopoietic stem cell generation in human embryo by single-cell RNA sequencing.  
728 *Cell Res*, *29*(11), 881-894. doi:10.1038/s41422-019-0228-6
- 729



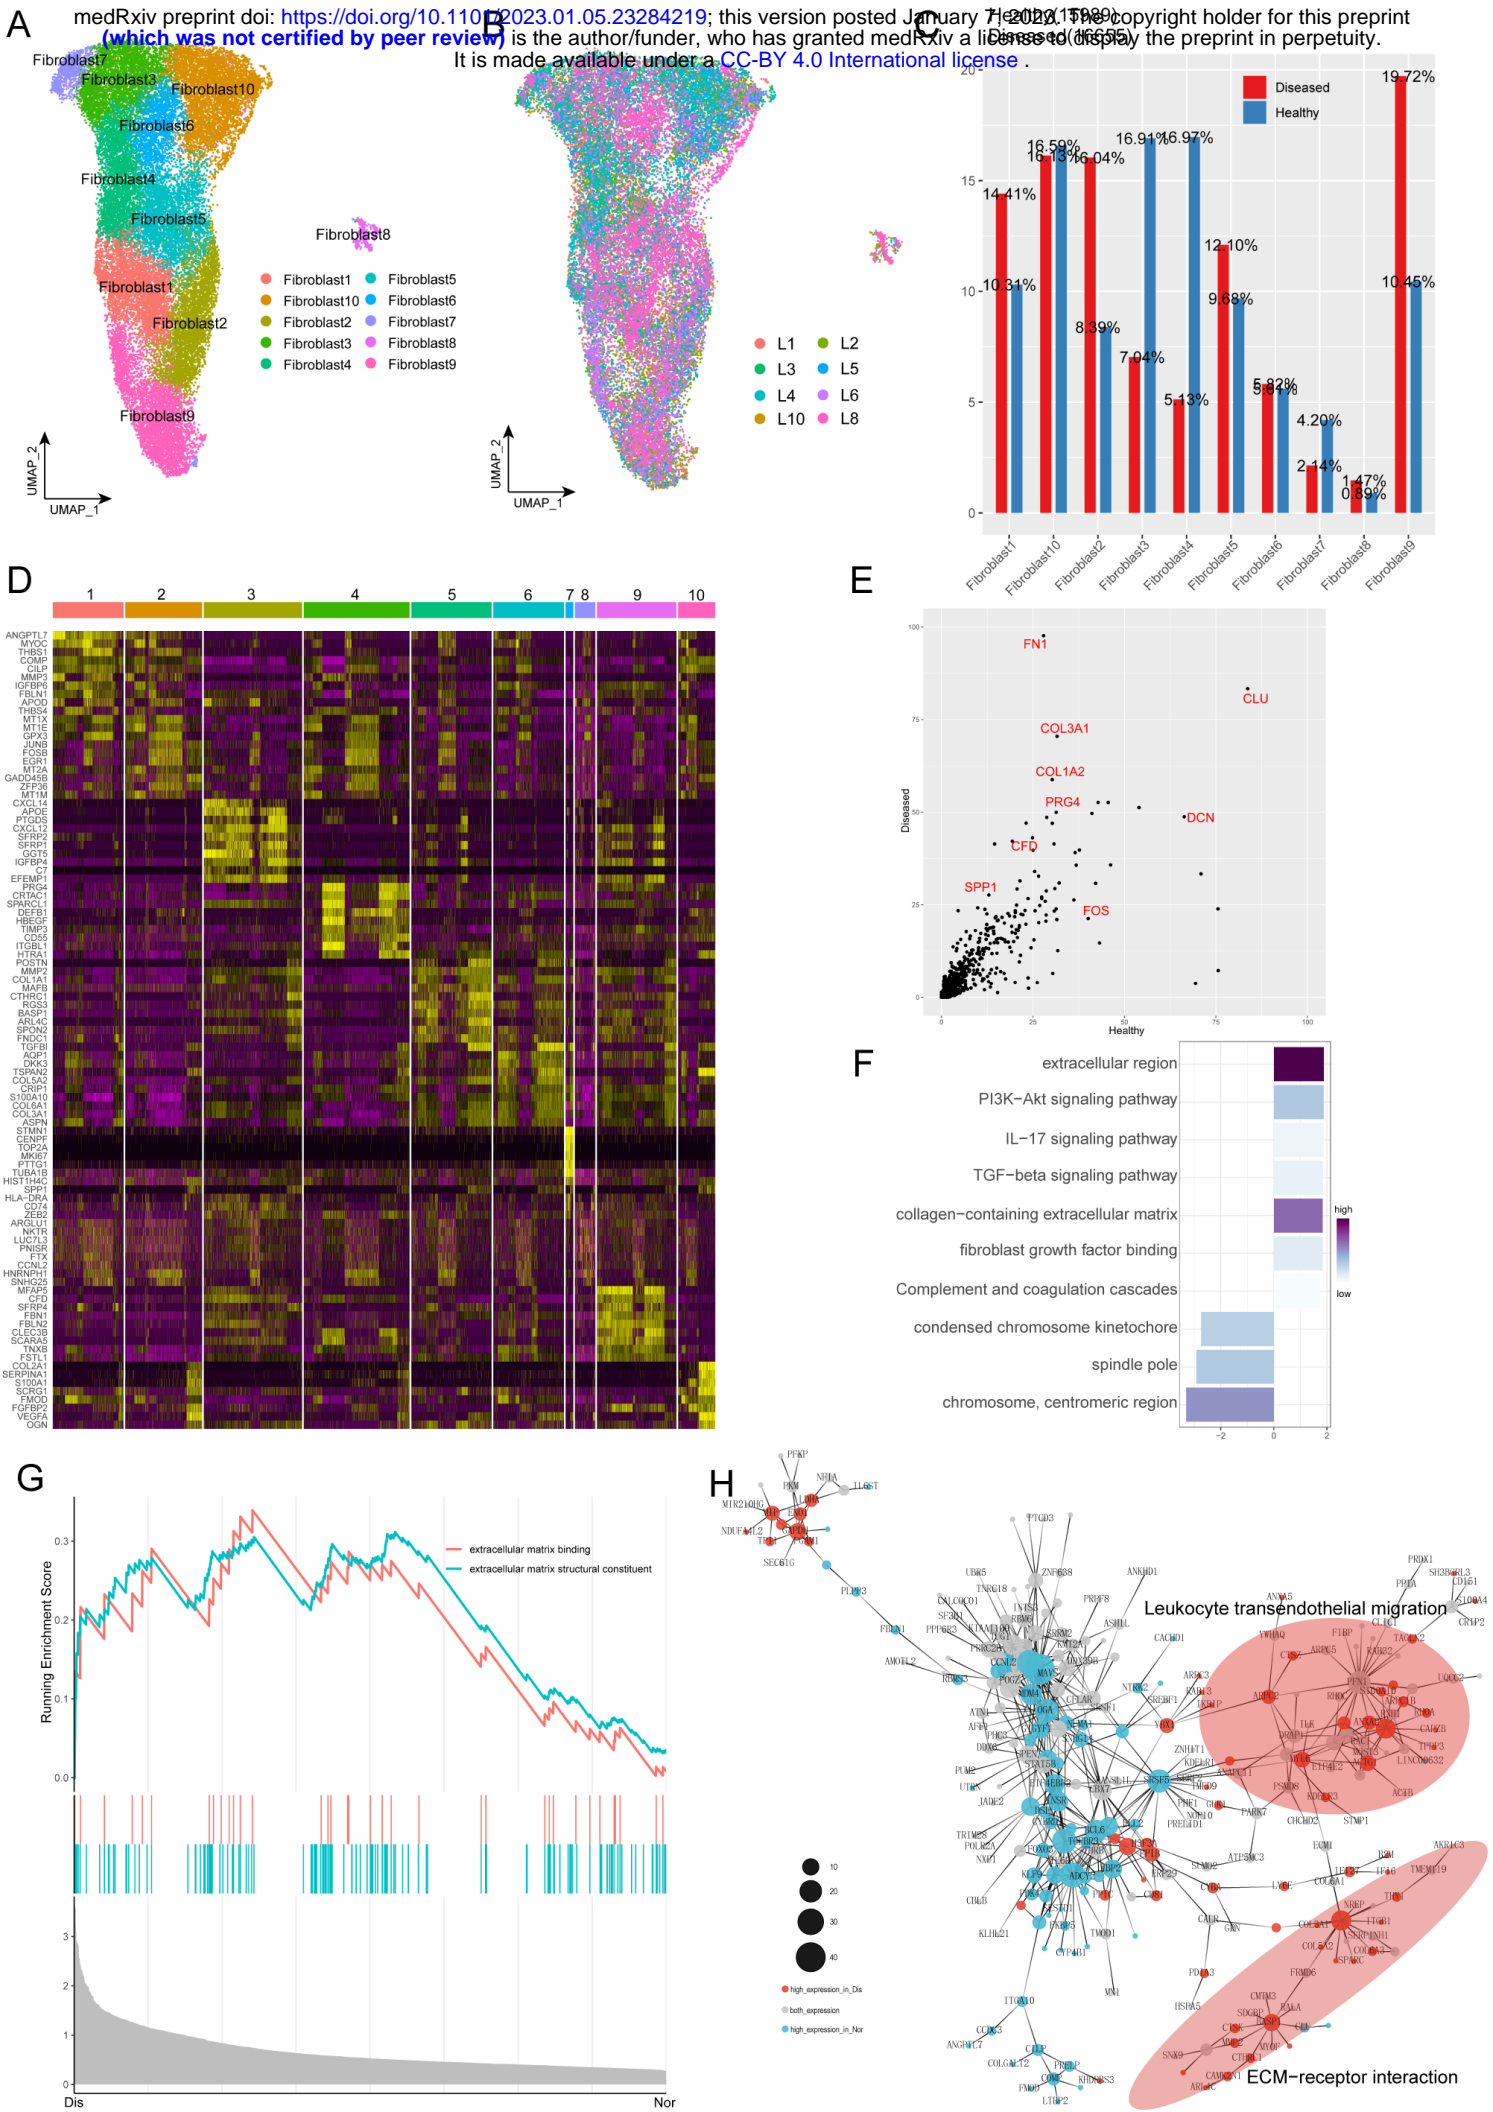

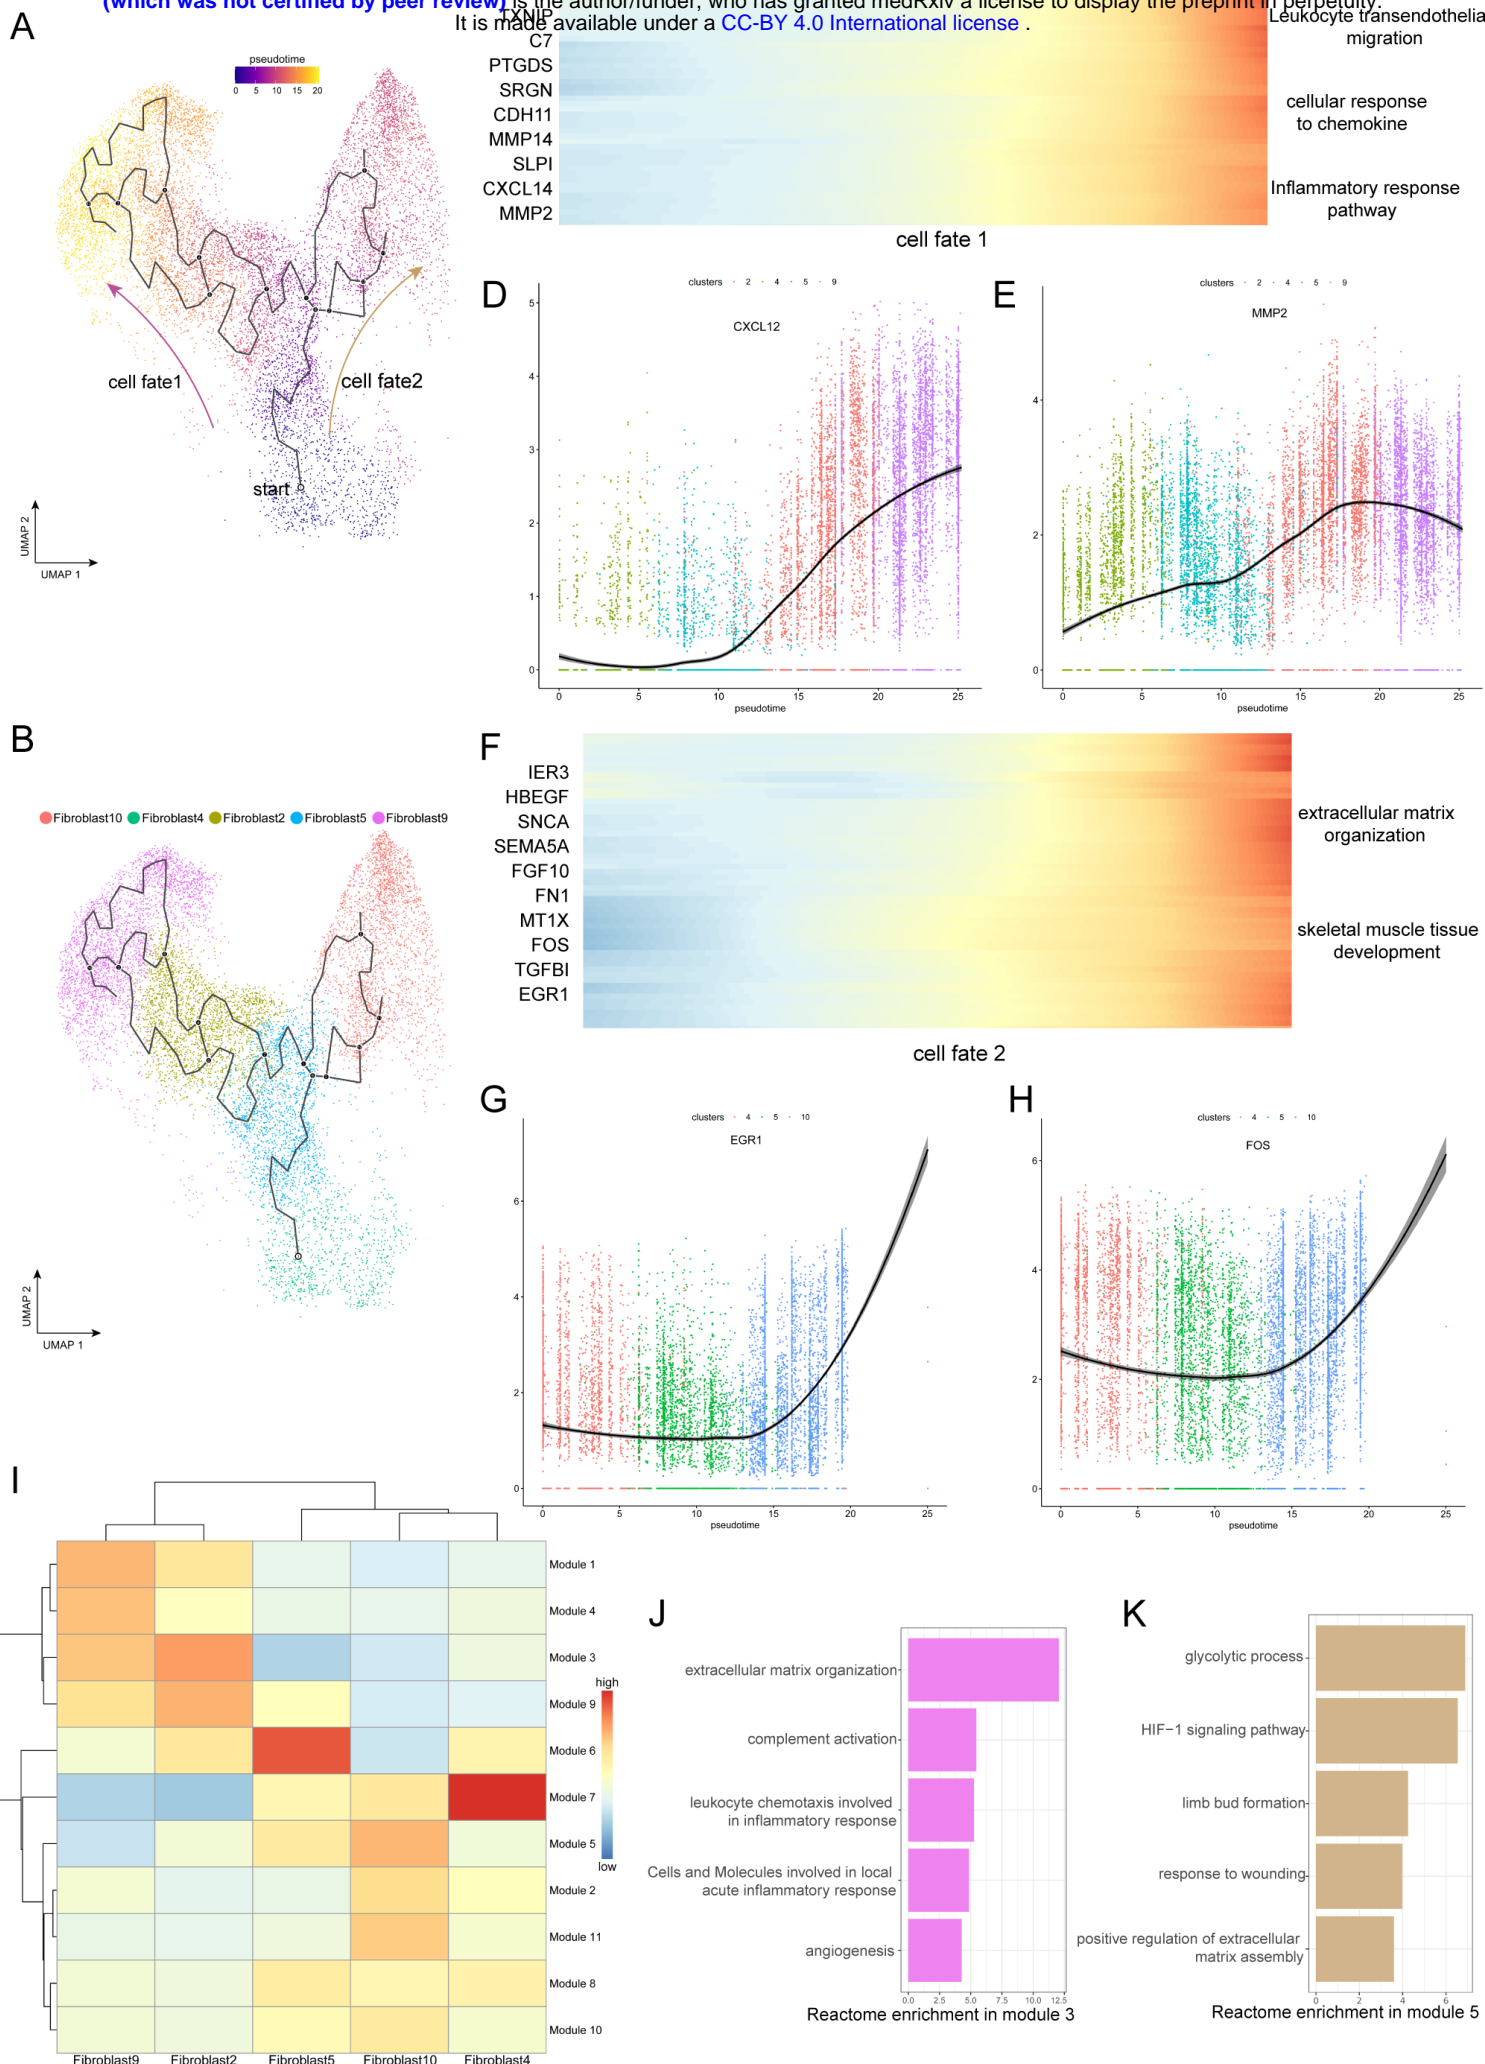

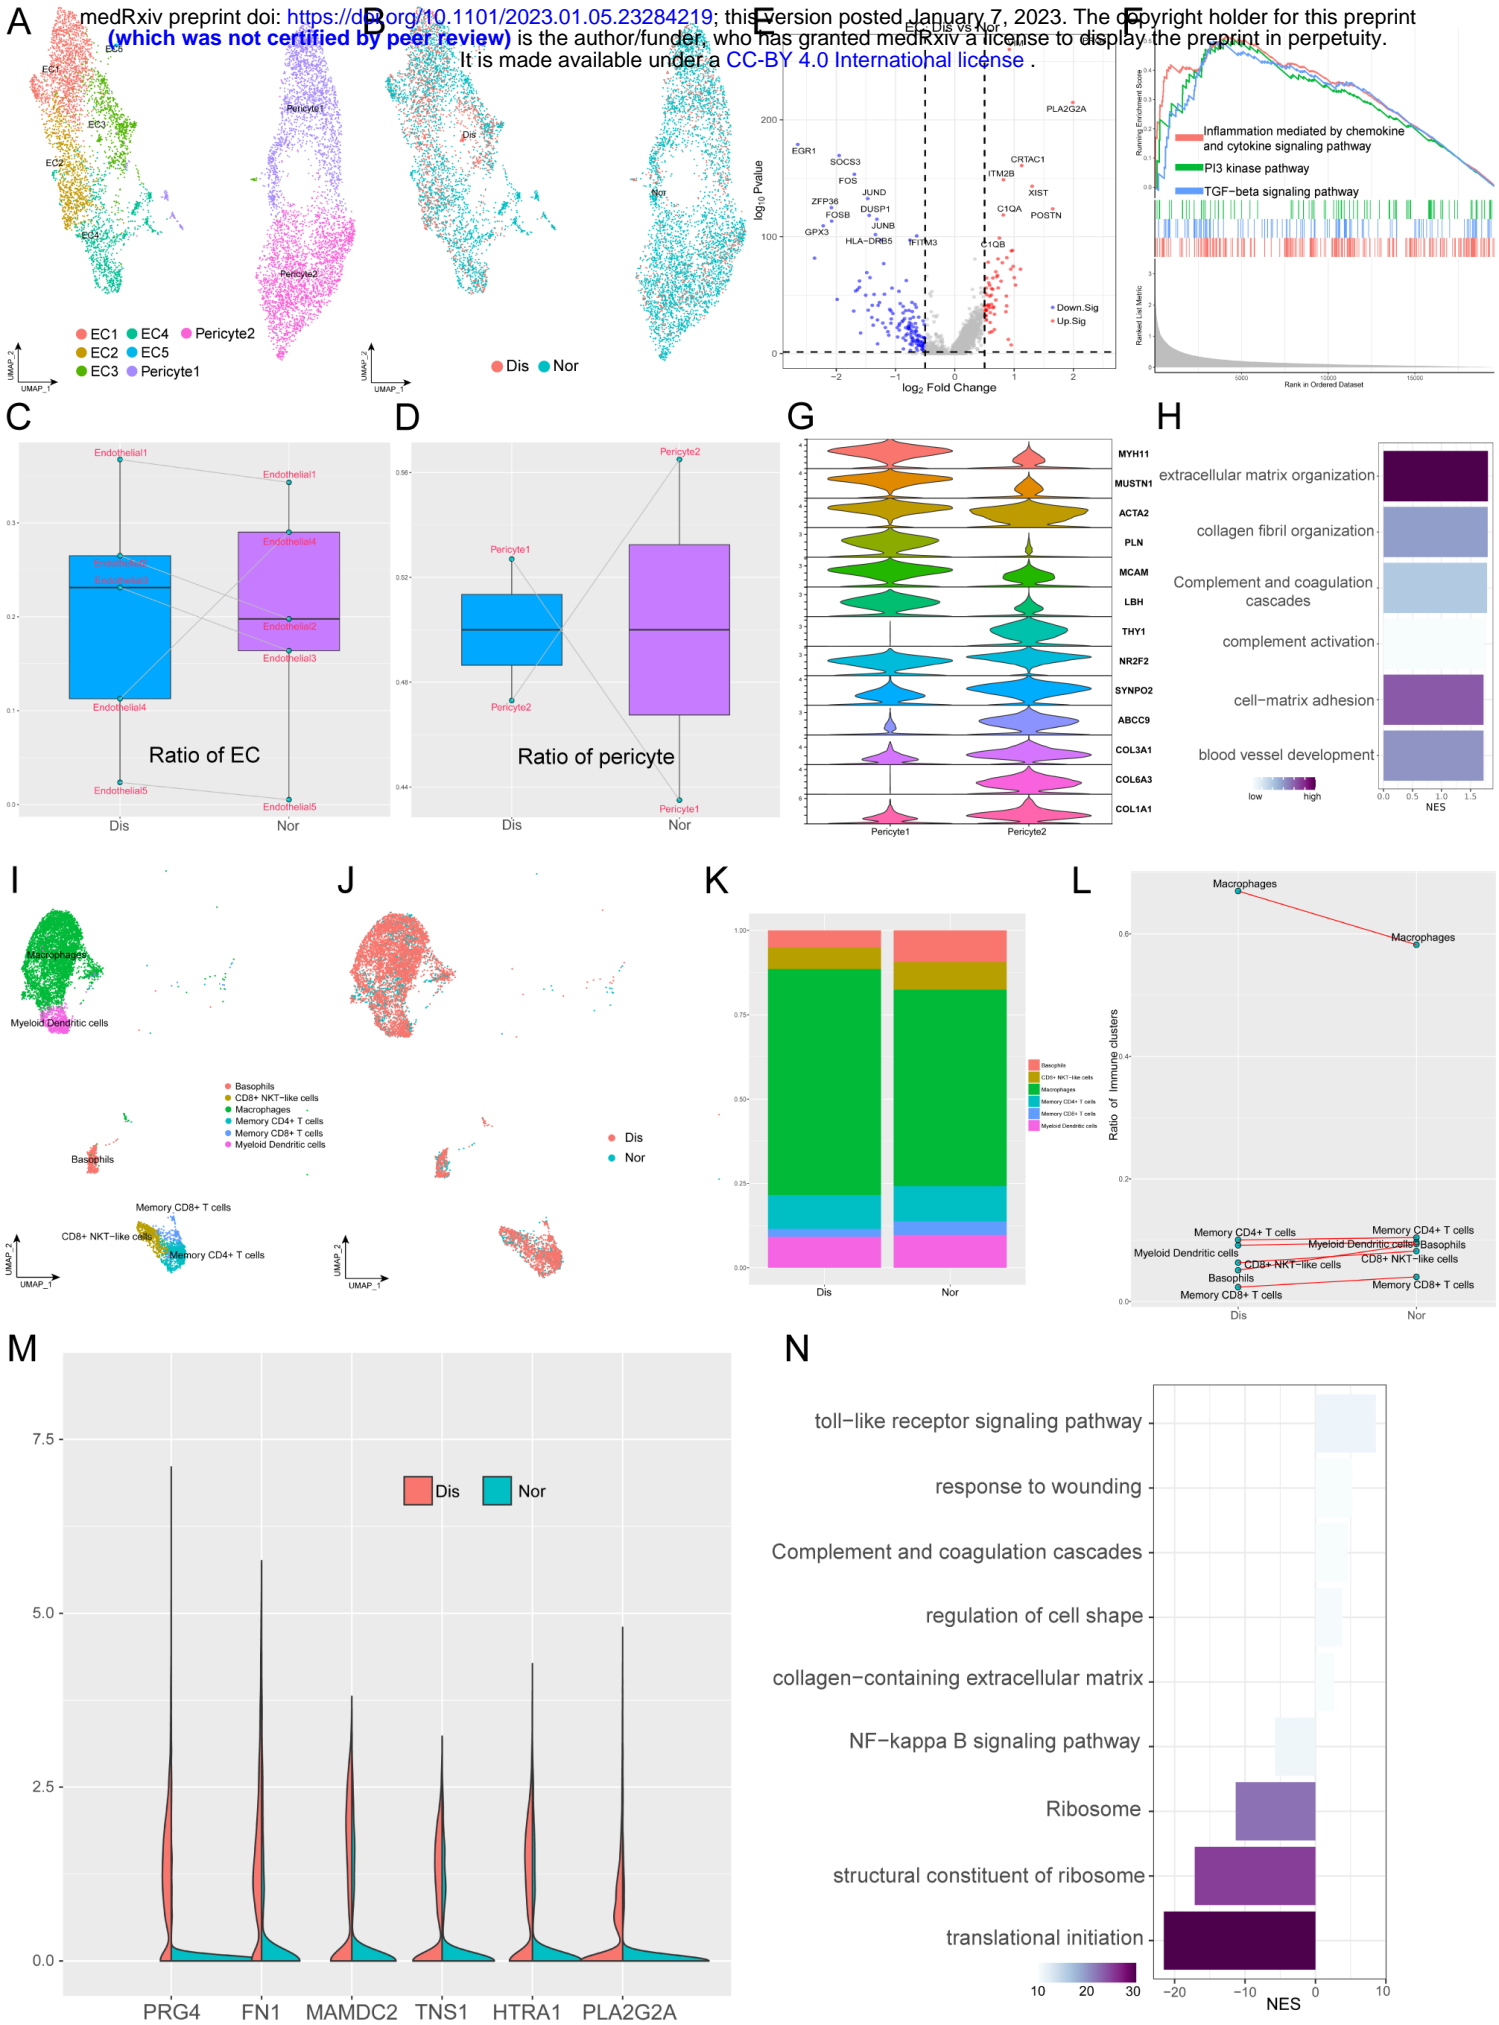

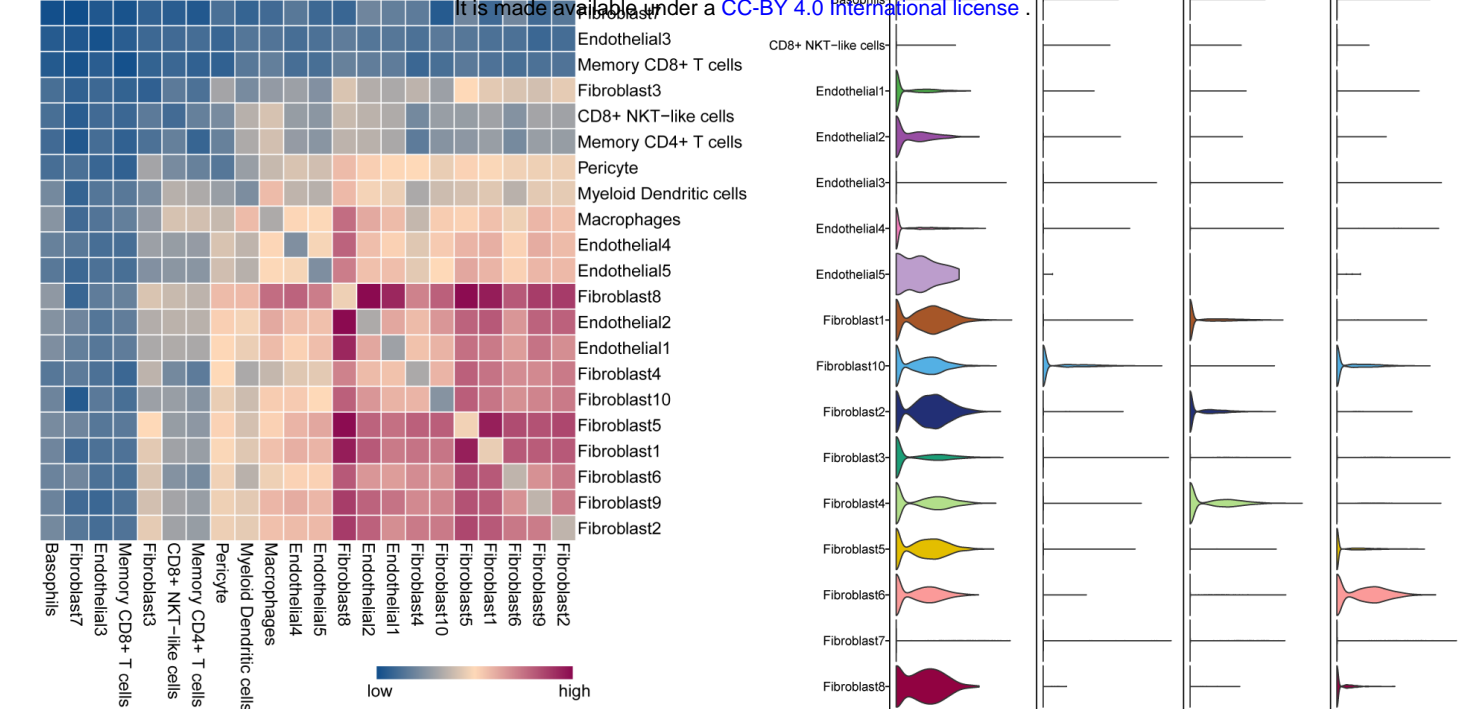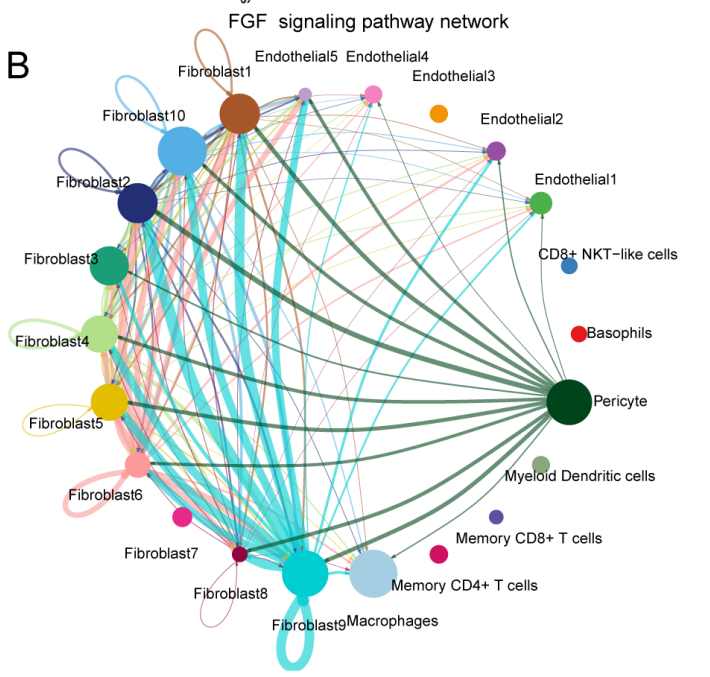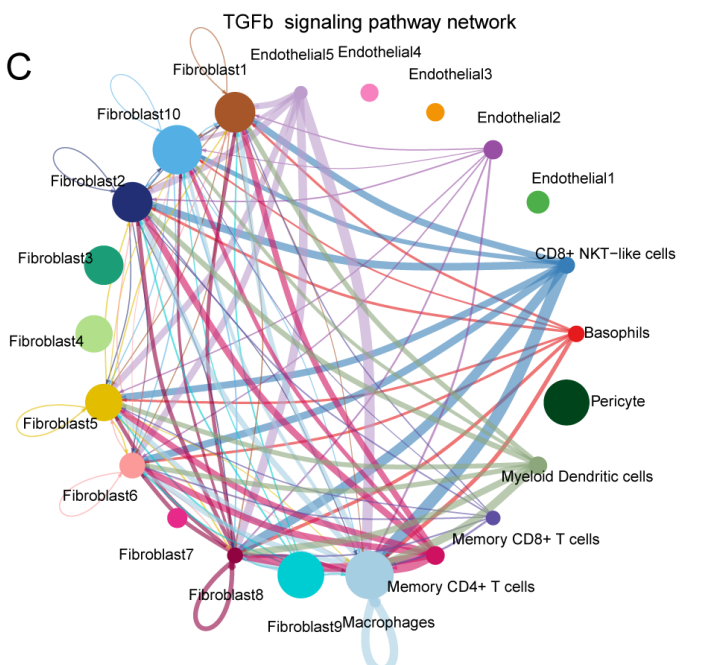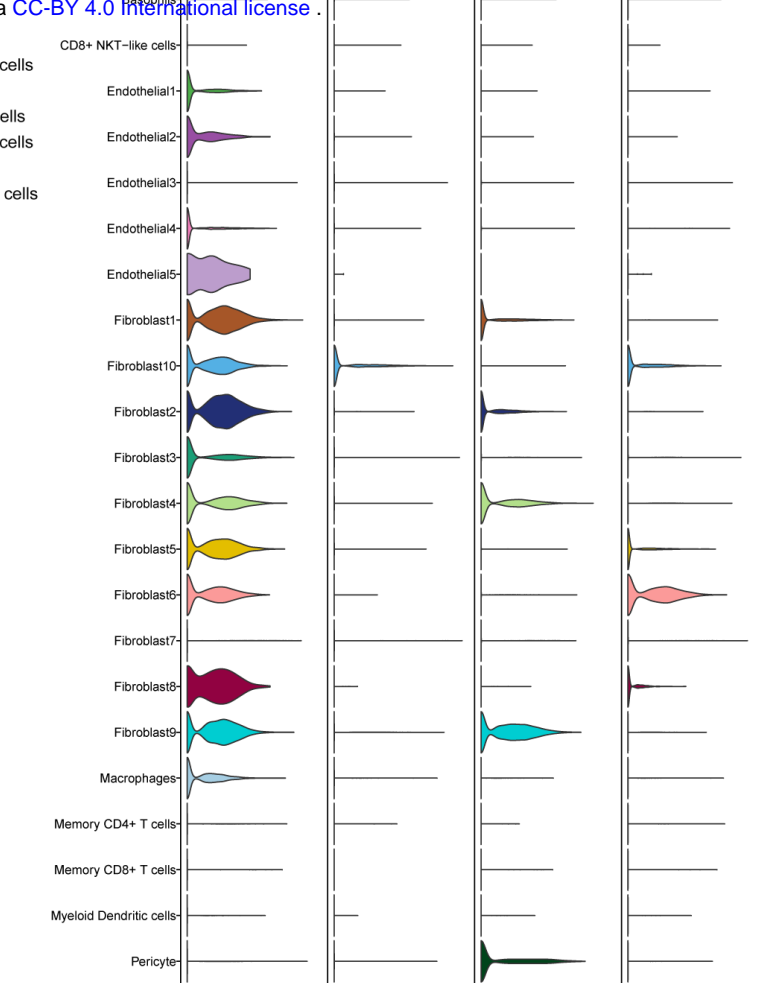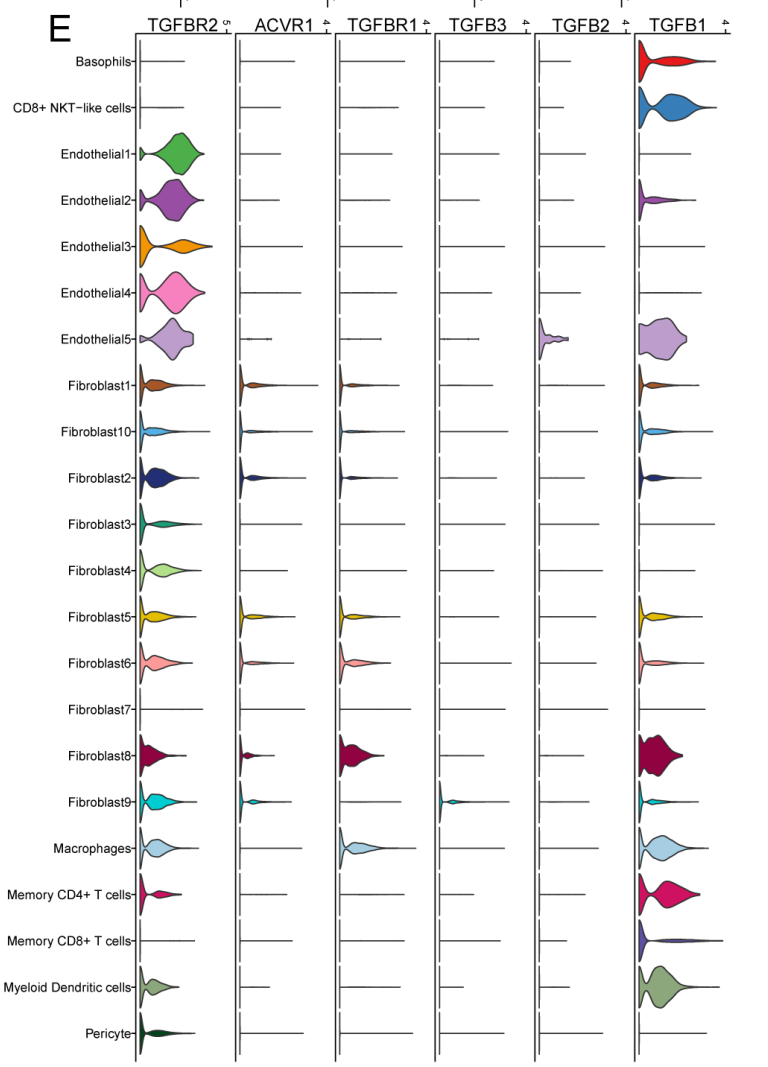

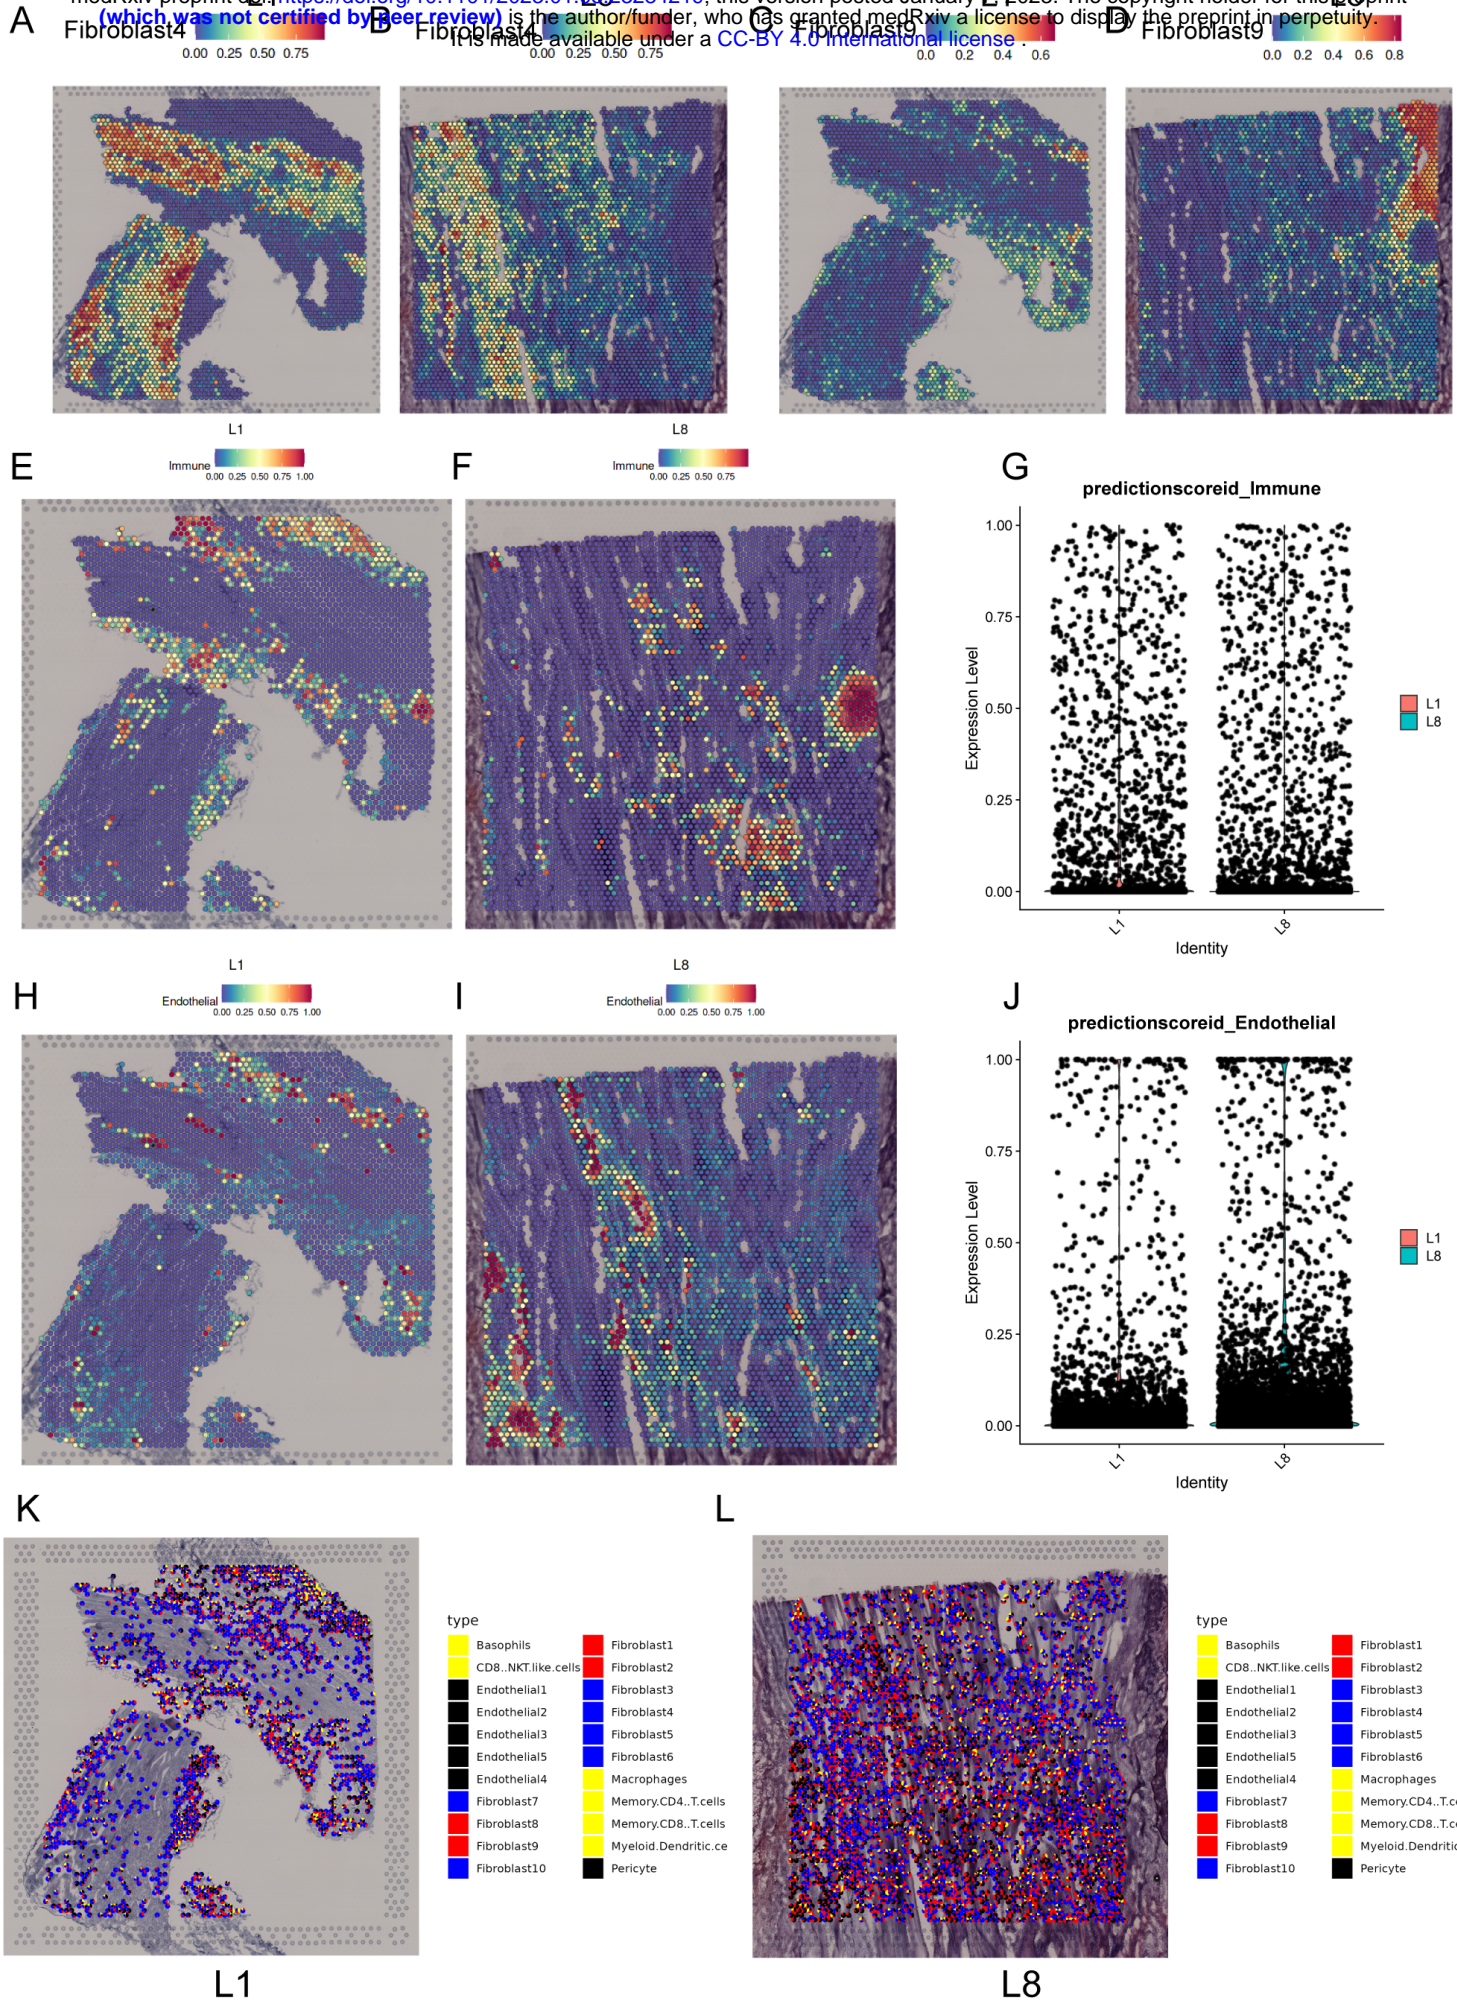



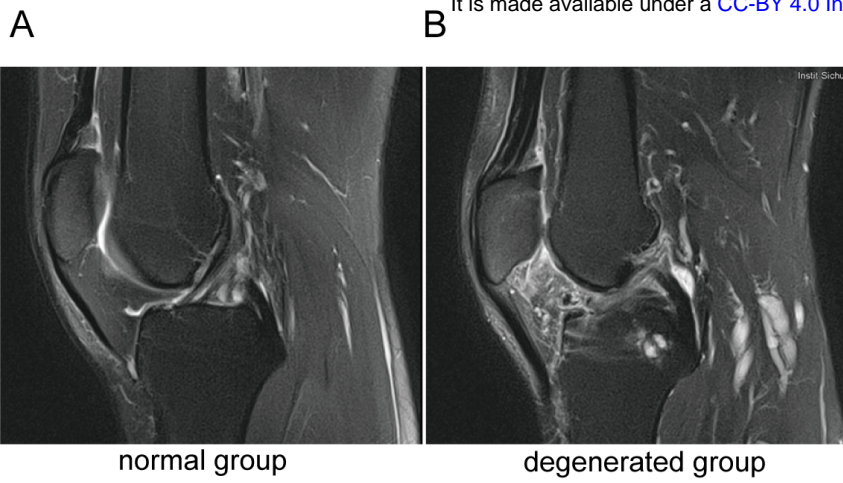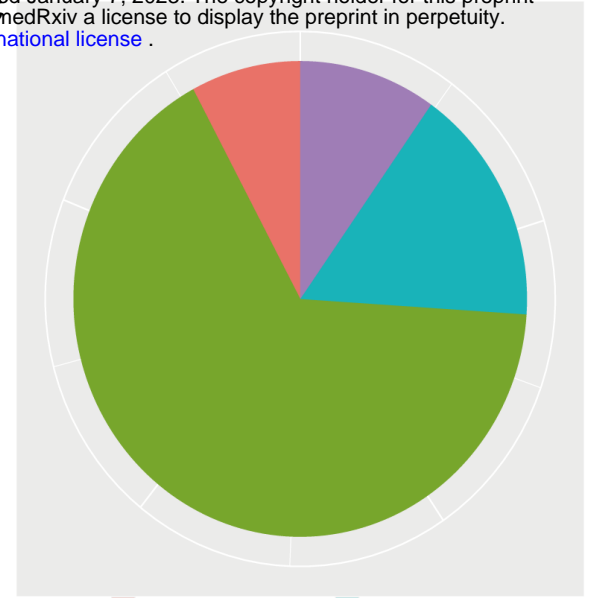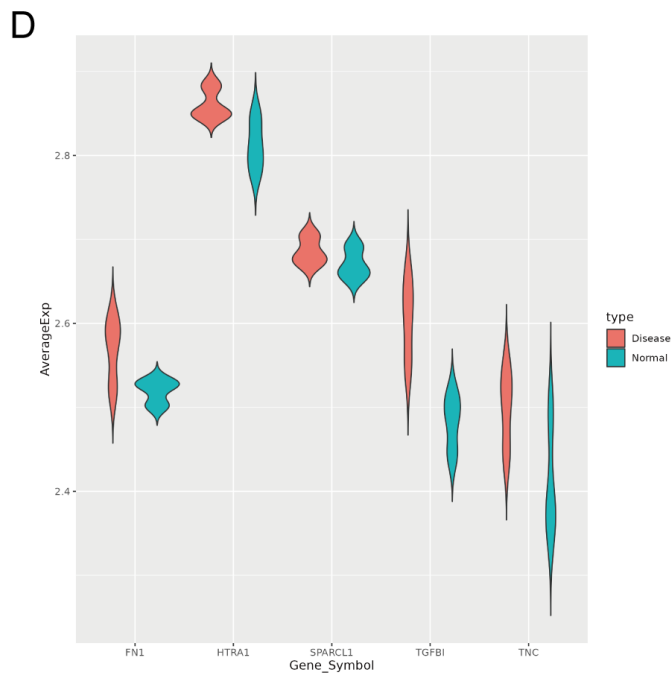

fibroblast

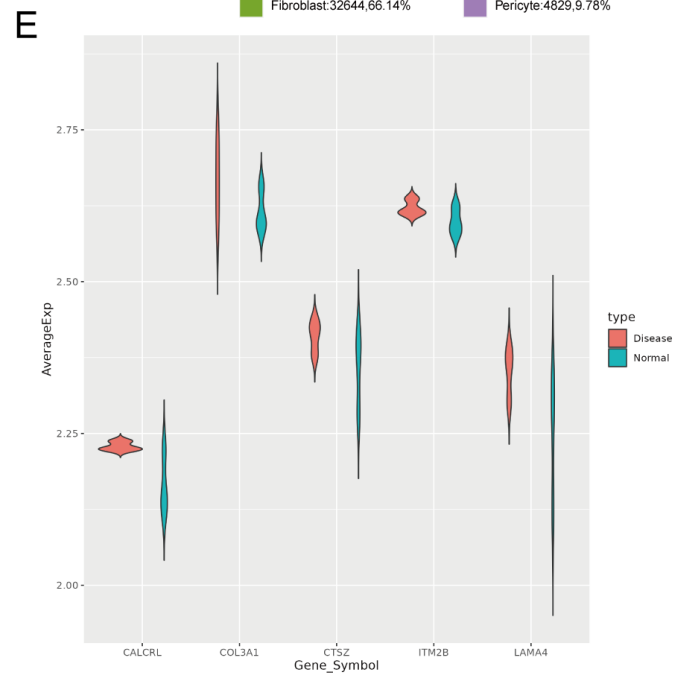

endothelial cell

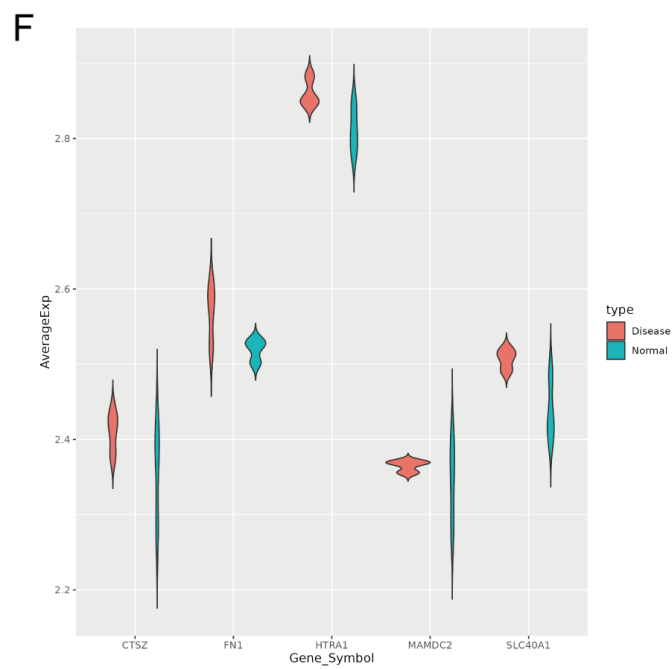

immune cell

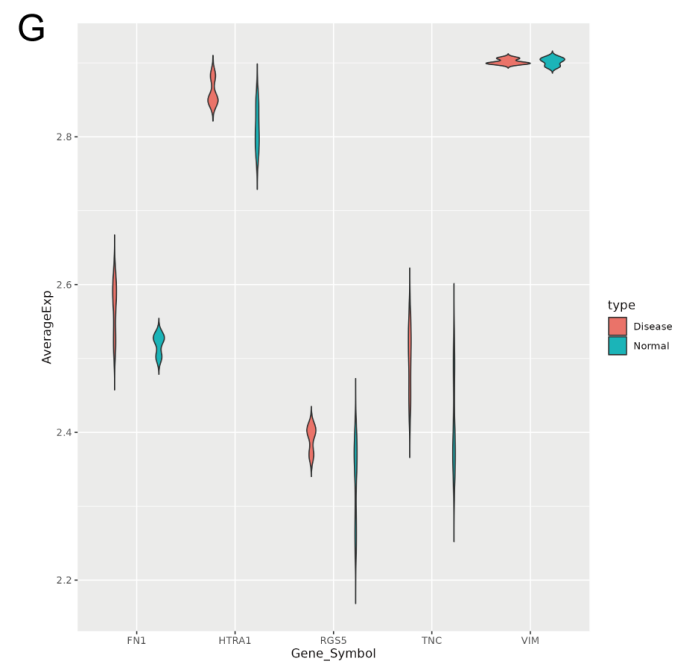

pericyte
